# 1 Vision-related convergent gene losses reveal *SERPINE3*'s unknown role 2 in the eye

3

4 Henrike Indrischek <sup>1,2,3,4,5,6</sup>, Juliane Hammer <sup>7</sup>, Anja Machate <sup>7</sup>, Nikolai Hecker <sup>1,2,3,#</sup>,  
5 Bogdan M. Kirilenko <sup>1,2,3,4,5,6</sup>, Juliana G. Roscito <sup>1,2,3§</sup>, Stefan Hans <sup>7</sup>, Caren Norden <sup>1§</sup>,  
6 Michael Brand <sup>7\*</sup>, Michael Hiller <sup>1,2,3,4,5,6\*</sup>

7

8 <sup>1</sup> Max Planck Institute of Molecular Cell Biology and Genetics, Pfotenhauerstr. 108, 01307  
9 Dresden, Germany

10 <sup>2</sup> Max Planck Institute for the Physics of Complex Systems, Nöthnitzer Str. 38, 01187 Dresden,  
11 Germany

12 <sup>3</sup> Center for Systems Biology Dresden, Pfotenhauerstr. 108, 01307 Dresden, Germany

13 <sup>4</sup> LOEWE Centre for Translational Biodiversity Genomics, Senckenberganlage 25, 60325  
14 Frankfurt, Germany

15 <sup>5</sup> Senckenberg Research Institute, Senckenberganlage 25, 60325 Frankfurt, Germany

16 <sup>6</sup> Faculty of Biosciences, Goethe-University, Max-von-Laue-Str. 9, 60438 Frankfurt, Germany

17 <sup>7</sup> Center for Regenerative Therapies Dresden (CRTD), TU Dresden, Fetscherstraße 105,  
18 01307 Dresden, Germany

19

20 # current affiliation: Center for Brain & Disease Research, VIB-KU Leuven, Herestraat 49,  
21 3000 Leuven, Belgium; Department of Human Genetics, KU Leuven, Herestraat 49, 3000  
22 Leuven, Belgium

23 § current affiliation: DRESDEN-concept Genome Center, DFG NGS Competence Center, c/o  
24 Center for Molecular and Cellular Bioengineering (CMCB), TU Dresden, 01307 Dresden,  
25 Germany

26 \$ current affiliation: Instituto Gulbenkian de Ciência, Rua da Quinta Grande 6, 2780-156  
27 Oeiras, Portugal

28

29 \*To whom correspondence should be addressed: Michael Brand <[michael.brand@tu-](mailto:michael.brand@tu-dresden.de)  
30 [dresden.de](mailto:michael.brand@tu-dresden.de)> & Michael Hiller <[michael.hiller@senckenberg.de](mailto:michael.hiller@senckenberg.de)>

31

## 32 Abbreviations:

33 KO - knockout

34 WT - wild type

35 RPE - retinal pigment epithelium

36 MG - Mueller glia

37 RT-qPCR - reverse transcription quantitative PCR

38 RNA-Seq - RNA-Sequencing

39 SNP - single nucleotide polymorphism

40 ISH - *In situ* hybridization

41 FDR - false discovery rate

42

43 Classification: Biological Science, Evolution

44

45 Keywords: convergent gene loss, visual acuity, vertebrate evolution, serine proteinase  
46 inhibitor

47

48

## 49 **Abstract**

50 Despite decades of research, knowledge about the genes that are important for development  
51 and function of the mammalian eye and are involved in human eye disorders remains  
52 incomplete. During mammalian evolution, mammals that naturally exhibit poor vision or  
53 regressive eye phenotypes have independently lost many eye-related genes. This provides  
54 an opportunity to predict novel eye-related genes based on specific evolutionary gene loss  
55 signatures. Building on these observations, we performed a genome-wide screen across 49  
56 mammals for functionally uncharacterized genes that are preferentially lost in species  
57 exhibiting lower visual acuity values. The screen uncovered several genes, including  
58 *SERPINE3*, a putative serine proteinase inhibitor. A detailed investigation of 381 additional  
59 mammals revealed that *SERPINE3* is independently lost in 18 lineages that typically do not  
60 primarily rely on vision, predicting a vision-related function for this gene. To test this, we show  
61 that *SERPINE3* has the highest expression in eyes of zebrafish and mouse. In the zebrafish  
62 retina, *serpine3* is expressed in Mueller glia cells, a cell type essential for survival and  
63 maintenance of the retina. A CRISPR-mediated knockout of *serpine3* in zebrafish resulted in  
64 alterations in eye shape and defects in retinal layering. Furthermore, two human  
65 polymorphisms that are in linkage with *SERPINE3* are associated with eye-related traits.  
66 Together, these results suggest that *SERPINE3* has a role in vertebrate eyes. More generally,  
67 by integrating comparative genomics with experiments in model organisms, we show that  
68 screens for specific phenotype-associated gene signatures can predict functions of  
69 uncharacterized genes.

70

71

72

73

## 74 Introduction

75 Disorders affecting eyes range from subtle vision impairment to blindness and are among the  
76 most prevalent diseases in the human population (1). For example, an estimated 76 million  
77 people worldwide suffer from glaucoma (2), a disease involving optic nerve damage, and  
78 about 1.8 million people are blind due to age-related macular degeneration, a degenerative  
79 disease of the central retina affecting retinal pigment epithelium (RPE) and photoreceptor cells  
80 (3, 4).

81  
82 Extensive research in the past decades identified many protein-coding genes with crucial roles  
83 in development and maintenance of different tissues and cell types in the eye as well as  
84 numerous genes that are associated with genetic eye disorders (1, 5). For example, the  
85 RetNet database (6) lists 271 genes associated with heritable retinal diseases. Even though  
86 the eye probably represents one of the best studied organs, our knowledge of the genes  
87 underlying eye diseases and disorders is still incomplete. For example, linkage analysis in  
88 patients with cataract, microcornea, microphthalmia, and iris coloboma identified new genomic  
89 loci linked to the diseases; however, the disease-causing genes have remained elusive (7-9).  
90 Similarly, the Cat-Map database (10) lists several additional cataract-associated loci where  
91 the underlying disease-causing gene has not been identified. Furthermore, there are still  
92 thousands of genes that have not been experimentally investigated in detail, leaving many  
93 genes where potential eye-related functions remain to be discovered. Indeed, systematic  
94 knockouts of 4364 genes in mouse detected ocular phenotypes for 347 genes, with 75% of  
95 them not been known as eye-related before (5). This indicates that vision-related genes as  
96 well as genes associated with genetic eye disorders remain to be identified and characterized.

97  
98 Interestingly, many genes that are linked to human eye diseases are inactivated (lost) in non-  
99 human mammals that naturally exhibit poor vision (11, 12). For example, subterranean  
100 mammals, such as the blind mole rat, naked mole rat, star-nosed mole and cape golden mole,  
101 exhibit gene-inactivating mutations in genes implicated in cataract, retinitis pigmentosa, color  
102 or night blindness, or macular degeneration in human (e.g. *ABCA4*, *BEST1*, *CRYBA1*, *EYS*,  
103 *GJA8*, *GNAT2*, *PDE6C*, *ROM1* and *SLC24A1*) (12-18). Symptoms that characterize these  
104 human eye diseases resemble traits found in these subterranean mammals, such as highly-  
105 degenerated retinas and lenses and sometimes blindness. Similarly, losses of the short wave  
106 sensitive opsin (*OPN1SW*), which is linked to color blindness in humans, occurred in several  
107 mammalian lineages such as cetaceans, bats, sloths and armadillos that are consequently  
108 inferred to have monochromatic vision (11, 19-23). In addition to losses of vision-related  
109 genes, subterranean mammals also exhibit widespread sequence and transcription factor  
110 binding site divergence in eye-related regulatory elements (24-26). Such mutations can cause  
111 mis-expression of target genes in ocular tissues such as the lens (27). Loss and divergence  
112 of vision-related genes and regulatory elements in these mammals is likely caused by the lack  
113 of natural selection on maintaining functional eyes in a dark environment. Taken together,  
114 previous studies established a clear association between naturally occurring poor vision

115 phenotypes and regressive evolution of the genetic machinery required for functional eyes  
116 (11, 17, 24, 25).

117

118 Here, we performed a genome-wide screen for genes preferentially lost in independent  
119 mammalian lineages with a low visual acuity with the goal of revealing currently  
120 uncharacterized genes, where vision-related gene loss patterns would predict vision-related  
121 functions. In addition to identifying losses of known vision-related genes, our screen revealed  
122 previously unknown losses of several functionally uncharacterized genes, among them  
123 *SERPINE3*, which is lost in 18 mammalian lineages that often do not use vision as the primary  
124 sense. We show that *SERPINE3* is specifically expressed in eye of zebrafish and mouse.  
125 Furthermore, by knockout of *serpine3* in zebrafish, we show that the gene is required for  
126 maintenance of a proper retinal lamination and overall eye shape, which confirms the  
127 predicted vision-related function. Collectively, our results confirm that *SERPINE3* has  
128 functions in vertebrate eyes and our discovery-driven study demonstrates how specific  
129 evolutionary divergence patterns can reveal novel insights into gene function (28).

130

131

## 132 **Results**

133

### 134 **A genome-wide screen retrieves genes preferentially lost in mammals with low visual** 135 **acuity**

136 To uncover potentially unknown vision-related genes, we used the Forward Genomics  
137 framework (29) to search for associations between convergent gene losses and poor vision  
138 phenotypes in mammalian lineages, where poor vision has independently evolved. Vision is a  
139 complex multifaceted trait that may not be easily captured with a single variable. In our study,  
140 we decided to select mammals with poor vision based on visual acuity values for two reasons.  
141 First, visual acuity describes the ability of an animal to resolve static spatial details, which  
142 generally reflects how much an animal relies on vision in comparison to other senses (30).  
143 Second, visual acuity data is available for 49 placental mammals with sequenced genomes,  
144 enabling a comprehensive genomic screen (Tab. S1). Using visual acuity values, we defined  
145 two groups. Low-acuity species have low visual acuity values  $<1$  ( $\log_{10}(va)<0$ ), which  
146 comprises ten species (three echolocating bats, three rodents and four subterranean  
147 mammals) representing seven lineages (Fig. 1A). All other species have visual acuity values  
148  $>1$  and comprise the group with higher visual acuity values.

149

150 Using this classification, we performed a genome-wide screen for genes that exhibit  
151 inactivating mutations (frame-shifting insertions or deletions, premature stop codons, splice  
152 site mutations, exon or gene deletions) preferentially in low-acuity species, similar to previous  
153 screens (31-33). Using a false discovery rate (FDR) cutoff of 0.05, we obtained 26 genes  
154 which were each convergently lost in at least three lineages of low-acuity mammals (Fig. 1B,  
155 Tab. S2). These genes include several known vision-related genes, such as components of  
156 the photoreceptor signal transduction cascade (*GUCA1B*, *ARR3*), a factor required for retinal



157 organization (*CRB1*), lens crystallins (*CRYBA1*, *CRYBB3*, *CRYGS*) and the cornea specific  
158 keratin 12 (*KRT12*). The set of 26 genes is enriched for vision-related functions such as the  
159 Gene Ontology term “visual perception” ( $p=5.9e-8$ ), expression in the mouse lens ( $p=1.0e-2$ ),  
160 and human eye diseases (cataract:  $p=6.0e-3$ ) (Fig. 1C, Tab. S3). This shows that our genome-  
161 wide screen successfully retrieved known vision-related genes.

162

163 Interestingly, while 14 of the 26 top-ranked hits have no studied role in the eye (Tab. S2),  
164 many of these genes are expressed in human eye and *RSKR*, *LACTBL1* and *ZNF529* even  
165 cluster in their expression pattern with other retina phototransduction and visual perception  
166 genes (34). The preferential loss of these genes in species that exhibit lower visual acuity  
167 values and that have convergently lost other known vision-related genes predicts an  
168 uncharacterized vision-related function for some of these genes (Fig. 1A).

169

### 170 ***SERPINE3* is convergently lost in low-acuity mammals**

171 We sought to experimentally test this prediction for a gene that is ranked highly in our screen.  
172 We focused on the second-ranked candidate, *SERPINE3* (serpin family E member 3), since  
173 the first-ranked gene in our screen, *TSACC* (TSSK6 activating cochaperone), encodes a  
174 chaperone that is specifically expressed in testis (34, 35) and is therefore unlikely to have an  
175 eye-related function. *SERPINE3* is largely uncharacterized and classified as lost in 7 of the 10  
176 low-acuity mammals (Fig. 1, Tab. S2). *SERPINE3* independently accumulated inactivating  
177 mutations in all four subterranean species (cape golden mole, star-nosed mole, naked mole  
178 rat, blind mole rat). Within bats, *SERPINE3* is inactivated in the two *Myotis* bats and the big  
179 brown bat (Yangochiroptera). These three species use echolocation instead of vision as the  
180 primary sense for hunting. In contrast, non-echolocating flying foxes (Pteropodidae) that rely  
181 more on vision possess an intact *SERPINE3* gene. Finally, varying the threshold used to  
182 classify species as having low-acuity vision, consistently retrieves *SERPINE3* as one of the  
183 top-ranked hits (Tab. S2), showing that this association is robust to the selected thresholds.

184

### 185 ***SERPINE3* became dispensable in many mammals that do not primarily rely on vision**

186 To explore the evolution of *SERPINE3* in additional mammalian genomes, we made use of an  
187 orthology data set generated by the TOGA (Tool to infer Orthologs from Genome Alignments)  
188 method (36) that includes 381 additional placental mammalian species that were not part of  
189 the genomic screen. Interestingly, this substantially extended data set revealed a number of  
190 additional losses of *SERPINE3*, typically in species that do not rely on vision as their primary  
191 sense (Fig. 2A). A detailed analysis of inactivating mutations indicates that *SERPINE3* is  
192 inactivated in 70 of the 430 analyzed placental mammals and that the gene is convergently  
193 lost at least 18 times in placental mammal evolution (Figs. S1-7, Tab. S4).

194

195 For example, *SERPINE3* is lost in several mammalian clades with nocturnal representatives  
196 that have a partially burrowing lifestyle such as pangolins (Manidae), armadillo and armadillos  
197 (Cingulata), which are characterized by proportionally small eyes (37, 38) (Fig. 2A, Figs. S1-  
198 2). All representatives of these clades use smell and hearing as primary senses for perception

199 of environmental clues and have a poor sense of vision (39). *SERPINE3* has also been lost in  
200 the stem lineage of Pilosa (sloths and anteaters). Whereas extant sloths have rather high  
201 visual acuity values (10.2 for southern two-toed sloth) (40), the Pilosa ancestor was likely a  
202 digging/burrowing species (41), indicating that *SERPINE3* loss originally occurred in a  
203 burrowing species. *SERPINE3* is also lost in solenodon, European shrew and tenrecs  
204 (Tenrecidae), species with small eyes that use echolocation for close-range spatial orientation  
205 (42-44) (Fig. 2B, Figs. S1, S3). For bats, our extended data set shows that *SERPINE3* is  
206 convergently lost in seven echolocating lineages, but remains intact in all 13 analyzed  
207 Pteropodid bats, revealing a clear pattern of convergent losses of this gene restricted to bat  
208 lineages relying on laryngeal echolocation (Figs. S4-6). The sac-winged bat is the only  
209 laryngeal echolocating bat with an intact *SERPINE3*; however, selection rate analysis  
210 indicates that the gene evolves under relaxed selection (Tab. S5). The available genomes  
211 support shared gene-inactivating mutations among many bat species, which likely represent  
212 ancestral events (Fig. 2A right). Expanding upon the two convergent losses of *SERPINE3* in  
213 subterranean rodents detected in the initial screen, the gene is also convergently lost in the  
214 fossorial Damara mole rat and evolves under relaxed selection in the Transcaucasian mole  
215 vole, while being intact in all other 63 rodents (Tab. S5, Fig. S7). In the expanded data set, we  
216 further uncovered the loss of *SERPINE3* in another clade of fossorial moles (Talpidae) within  
217 the order of Eulipotyphla (Fig. S3). A splice site mutation shared between dugong and  
218 manatee as well as patterns of relaxed selection indicate an ancestral loss of *SERPINE3* in  
219 the ancestor of sirenians, which mostly use their tactile sense for navigation through murky  
220 water (45) (Fig. S1, Tab. S5). Consistent with our definition of poor vision based on visual  
221 acuity, the Florida manatee has a reduced ability to resolve spatial detail ( $va = 1.6$  (46))  
222 compared to its closest relatives, the African elephant ( $va = 13.16$  (47)), which has an intact  
223 *SERPINE3* gene. Finally, *SERPINE3* is also lost in the cape elephant shrew, which is a mostly  
224 diurnal species with relatively large eyes (48); however, loss of *SERPINE3* already occurred  
225 in the ancestral Afroinsectiphilia lineage (Fig. S1), which was presumably nocturnal (49).

226

227 Together, many independent gene losses in species that do not rely on vision as their primary  
228 sense predicts a vision-related function for *SERPINE3* that became dispensable in these  
229 mammals, leading to convergent *SERPINE3* losses due to relaxed selection.

230

### 231 ***SERPINE3* encodes a putative secreted proteinase inhibitor**

232 Based on sequence homology, *SERPINE3* is classified as a member of the **serine proteinase**  
233 **inhibitor (SERPIN)** family. Many members of this family are secreted into the extracellular  
234 space and inhibit their substrates by covalent binding (50, 51). We performed a *SERPINE3*  
235 sequence analysis, which revealed that key sequence features of inhibitory serpins are well  
236 conserved among placental mammals, suggesting that *SERPINE3* also functions as a  
237 secreted serine proteinase inhibitor (SI Text, Figs. S8-9).

238

239 Serpins have roles in coagulation, angiogenesis, neuroprotection and inflammation, and  
240 several serpins have been implicated in human diseases (51, 52). However, the functional

241 role of *SERPINE3* is largely unknown as the gene has never been studied in an animal or  
242 cellular model. A thorough literature search revealed that *SERPINE3* is listed (often in the  
243 supplement) among many other genes, as differentially expressed in large-scale expression  
244 analyses. For example, *Serpine3* is upregulated in the mouse retina in response to  
245 overexpressing neuroprotective factors (53). *Serpine3* was also upregulated in complement  
246 component 3 (*C3*) knockout mice, which represent a model of the aged retina (54), and  
247 downregulated in the eye of knockout mice for *PCARE*, a causal gene for retinitis pigmentosa  
248 (55). Together, while this gene was never studied in greater detail, literature clues and the  
249 striking convergent gene loss pattern in mammals with poor vision suggest that *SERPINE3*  
250 may have a functional role in the eye.

251

### 252 ***Serpine3* is specifically expressed in Müller glia in the adult zebrafish retina**

253 To test the prediction that *SERPINE3* has an eye-related function, we first analyzed its  
254 expression pattern in adult zebrafish (Fig. 3). Zebrafish has proven as valuable model species  
255 for the study of eye genetics as it has a cone-dominated retina (~60% cones, ~40% rods)  
256 (56), similar to the central human retina. Furthermore, zebrafish have a single *serpine3*  
257 ortholog that is located in a context of conserved gene order (Fig. 4A), which makes zebrafish  
258 a suitable model for investigation of *serpine3* expression and function. Reverse transcription  
259 quantitative PCR (RT-qPCR) analysis of biological triplicates revealed that the highest  
260 *serpine3* expression is in the eye, followed by significantly lower expression in the brain (one-  
261 sided t-test,  $p=0.031$ , Fig. 3A). *Serpine3* expression was not detectable in the other tested  
262 adult tissues (heart, intestine, liver and testis).

263

264 To better characterize *serpine3* expression in the eye, we next performed RT-qPCR on  
265 samples of RPE, retina and eye without retina and RPE (Fig. 3B). *Serpine3* is expressed  
266 significantly higher in the retina compared to RPE only (two-sided t-test,  $p=0.013$ , Fig. 3B). It  
267 is barely detectable in whole eye without retina and RPE (two-sided t-test, eye vs. retina,  
268  $p=0.008$ , Fig. 3B), suggesting that the expression signal obtained from whole eye RT-qPCR  
269 mostly originates from expression in retina.

270

271 To specify in which cell types *serpine3* is expressed, we finally performed *in situ* hybridization  
272 (ISH) on adult zebrafish retinas. *Serpine3* expression is detected in the inner nuclear layer  
273 throughout the retina with stronger signals in the ventral region close to the optic nerve (Fig.  
274 3D, E). Co-staining with different cell type specific markers reveals expression of *serpine3* in  
275 a fraction of glial fibrillary acidic protein (*gfap*)-positive Müller glia (MG) cells (Fig. 3F, G, Fig.  
276 S10), whereas expression of *serpine3* mRNA was not detected in bipolar or amacrine cells  
277 (Fig. S11).

278

279 To also explore *SERPINE3* expression in mammals, we first used RT-qPCR to analyze  
280 *Serpine3* expression in mouse. Similar to zebrafish, mouse *Serpine3* expression is highest in  
281 whole eye, whereas expression was barely detectable in colon, cortex, heart, liver, spleen and  
282 testis (Fig. 3C). Next, we analyzed *SERPINE3* expression in other mammals and vertebrates

283 using publicly available expression data sets. Despite sparser data, we found evidence for  
284 expression of *SERPINE3* in eyes of human, rat, cat, cow and chicken, which suggests a  
285 conserved expression pattern and a role in vertebrate vision (Tab. S6).

286

287 In summary, our experiments in zebrafish and mouse together with available data sets of  
288 different vertebrates show that *SERPINE3* is expressed in the vertebrate eye, specifically in  
289 zebrafish in MG cells.

290

### 291 **Knockout of *serpine3* in zebrafish leads to morphological defects in the eye including** 292 **the retina**

293 Next, we tested whether *serpine3* inactivation results in an eye phenotype. To this end, we  
294 deleted the transcription start site of *serpine3* with CRISPR-Cas9, denoted as the *serpine3*<sup>cbg17</sup>  
295 allele (Fig. 4A, Figs. S12-13). Adult homozygous *serpine3*<sup>cbg17</sup> fish were viable and fertile.  
296 Using RT-qPCR and ISH, we confirmed that the deletion of the transcription start site  
297 completely abolished *serpine3* expression in retinae of adult homozygotes for *serpine3*<sup>cbg17</sup>  
298 compared to wild type (WT) siblings (Fig. 4B, C).

299

300 We found that adult *serpine3*<sup>cbg17</sup> individuals frequently showed notches in the iris of one of  
301 the eyes (4 of 5 individuals, Tab. S7, white arrow in Fig. 4D), which affected the eye's overall  
302 shape. To confirm that these notch-caused shape deviations are caused by inactivation of  
303 *serpine3*, we generated an independent line, where we introduced an early frameshift in  
304 *serpine3*'s coding exon 1 with CRISPR-Cas9, denoted as the *serpine3*<sup>cbg18</sup> allele (Fig. 4A,  
305 Figs. S12-13). *Serpine3*<sup>cbg18</sup> fish also showed a high frequency of notches in 13 of 20  
306 individuals (Tab. S7). To quantify this shape deviation, we calculated iris solidity, which  
307 compares the area ratio of the eye's outer shape (white line) and its concave shape (red dotted  
308 line in Fig. 4D). Eyes of both *serpine3*<sup>cbg17</sup> and *serpine3*<sup>cbg18</sup> individuals had a significantly  
309 reduced solidity in comparison to their WT siblings (Wilcoxon rank sum test, p=0.009 and  
310 p=6.35e-9, respectively, Fig. 4E). Iris circularity, another descriptor of the eye shape deviation,  
311 is also significantly reduced in homozygous individuals of both lines (Fig. S14). Together this  
312 indicates that mutations in *serpine3* cause eye shape deviations in zebrafish.

313

314 We next investigated the ocular morphology of adult fish of both lines and their WT siblings  
315 using hematoxylin/eosin sections (Fig. 4F; Figs. S15-16). While ocular structure and optic  
316 nerves of all inspected eyes are largely normal (Fig. S15), the distance between retina and  
317 lens is reduced in *serpine3*<sup>cbg17/18</sup> KO fish (Fig. 4F, Fig. S16). A detailed inspection of the retinal  
318 organization revealed that although all retinal layers were present, the mutant retinae are  
319 generally less organized and structured compared to WT siblings. Retinal cells appear  
320 reduced in number and less densely packed. Most prominently, we noticed that rod outer  
321 segments and the pigmented RPE cells, which were aligned in WT fish, were not clearly  
322 separated in *serpine3*<sup>cbg17/18</sup> fish (Fig. 4F c-e, Fig. S16). Furthermore, we observed large  
323 clusters of pigmented cells in the photoreceptor layer (empty arrows, Fig. 4F c-e) as well as  
324 single displaced pigmented cells in all retinal layers (yellow arrows, Fig. 4F c-e). Similar

325 alterations in retinal structure were detected in *serpine3*<sup>cbg18</sup> fish (Fig. S16). This shows that  
326 KO of *serpine3* in zebrafish results in morphological defects in the eye, characterized by  
327 differences in eye shape and retinal organization.

328

### 329 **Polymorphisms near human *SERPINE3* are associated with human eye phenotypes**

330 We next analyzed recently published Genome Wide Association Study data for human single  
331 nucleotide polymorphisms (SNPs) associated with eye-related traits. This analysis revealed  
332 two such SNPs that are in linkage disequilibrium with *SERPINE3* (Fig. 4A, Tab. S8).  
333 rs1028727 is located ~10 kb upstream of the *SERPINE3* transcription start site and is  
334 associated with a decreased area of the optic nerve head (57). rs7327381 is located ~97 kb  
335 downstream of the *SERPINE3* transcription start site and is associated with an increase in  
336 corneal curvature (58). This suggests that human SNPs linked to *SERPINE3* are associated  
337 with eye phenotypes, supporting a putative ocular function of human *SERPINE3*.

338

339

## 340 **Discussion**

341 Our study combines comparative genomics to predict genes having vision-related functions  
342 and experiments in zebrafish to confirm this prediction for a top-ranked candidate, the  
343 uncharacterized *SERPINE3* gene. By conducting a genome-wide screen for genes that are  
344 preferentially lost in mammals with low visual acuity values, we uncovered both known vision-  
345 related genes as well as several genes that have no known eye-related function. One of the  
346 top-ranked candidates is *SERPINE3*, which we found to be independently lost at least 18 times  
347 in mammalian evolution, preferentially in species that do not use vision as the primary sense.  
348 For mouse and zebrafish, we show that the highest *SERPINE3* expression is in the eye, which  
349 is corroborated by available expression data of other vertebrates. By generating the zebrafish  
350 *serpine3*<sup>cbg17</sup> and *serpine3*<sup>cbg18</sup> knockout (KO) lines, we show that inactivation of this gene  
351 results in abnormal eye shape and retinal lamination, revealing an eye-related function for  
352 *serpine3*. This is further supported by *SERPINE3*-linked polymorphisms that are associated  
353 with eye-related traits in human.

354

355 In zebrafish, *serpine3* is expressed in a fraction of Mueller glia (MG) cells. MG are the major  
356 retinal macroglia and perform numerous functions. By removing waste products and secreting  
357 (neuro)trophic substances and signaling molecules, they maintain the blood-retinal barrier and  
358 regulate vascularization (59). Most importantly, MGs are essential for the long-term viability of  
359 photoreceptors and other neuronal cell types (60). Our *serpine3* KO fish exhibit a  
360 disorganization of RPE cells, a phenotype that resembles those previously observed in  
361 experiments that perturb MG function. For example, selective ablation of MG in adult mice  
362 results in eye defects including aggregation of RPE cells and displacement of pigment  
363 granules in the ganglion cell layer (61). Interestingly, we also observed that *serpine3* KO  
364 affects eye shape, which cannot be readily explained by a direct MG-mediated effect.  
365 However, MG span the entire retina, connecting the extracellular space of retinal neurons, the  
366 vitreous and the capillaries at the apical retina (59, 62). It is therefore possible that a secreted



367 protein, as predicted for *serpine3* based on its conserved signal peptide, may also affect other  
368 eye subtissues. Finally, in zebrafish, MG are able to regenerate retinal neurons upon injury.  
369 However, *serpine3* does not seem to be involved in this process as during stress-induced  
370 regeneration, it is upregulated in resting MG that do not proliferate (63).

371

372 In mammals, the *SERPINE3* gene loss pattern and expression profile in several species also  
373 support an eye-related function; however, the cell type expression pattern may differ between  
374 mammals and zebrafish. While our experiments in zebrafish show *serpine3* expression in MG,  
375 which is in agreement with (63), in mouse and human, *SERPINE3* seems to be expressed in  
376 RPE (63-65) indicating that cell type specificity may differ between mammals and fish. As  
377 *SERPINE3* is likely a secreted extracellular protein, it is possible that it has a similar function  
378 in mammals and zebrafish, despite secretion from different cell types. Whether this is the case  
379 or whether *SERPINE3* function and protein expression pattern in the mammalian eye differs  
380 remains to be explored in future studies. At the molecular level, this question may be  
381 addressed by investigating whether the molecular targets of *SERPINE3* are conserved among  
382 vertebrates.

383

384 Of particular interest is elucidating the functional role of *SERPINE3* in human. Several pieces  
385 of evidence indicate a potential role of this gene in anti-inflammatory processes and retinal  
386 survival. *SERPINE3* is upregulated in human patients with age-related macular degeneration  
387 (66), a progressive eye disease that is linked to chronic inflammation and wound healing.  
388 Consistent with a role in retinal survival, mouse *Serpine3* is upregulated after experimental  
389 overexpression of neurotrophin-4, a neuroprotective factor that promotes retinal survival (53).  
390 Furthermore, *SERPINE3* is a hallmark gene of differentiated, healthy human RPE cells (67-  
391 69) that also have neurotrophic functions in the retina. It is thus conceivable that perturbation  
392 of proper *SERPINE3* expression or function may influence age-related diseases or human eye  
393 phenotypes, as indicated by human polymorphisms that are linked to *SERPINE3*.

394

395 In addition to *SERPINE3*, our screen also revealed other candidate genes for which unknown  
396 eye-related functions are plausible. The *LACTBL1* gene encodes a putative serine proteinase  
397 (70) and has an expression pattern similar to retina phototransduction genes (34).  
398 Furthermore, 20 kb upstream of *LACTBL1* is a linked SNP (rs10158878) that is associated  
399 with refractive error in human (GWAS catalog, (71)). Another uncharacterized candidate gene  
400 with a strong visual acuity associated loss pattern is *SAPCD1*. A missense mutation  
401 (rs6905572) within this gene is associated with macular degeneration (dbSNP, (72)). Finally,  
402 *LRIT2* is linked to SNPs (rs12217769 and rs745480) that are associated with macular  
403 thickness and refractive error in human. Whereas this gene was not functionally characterized  
404 at the time our screen was conducted, a recent study showed that *lrit2* knockdown led to a  
405 reduction in eye size in zebrafish (73). Thus, in addition to *SERPINE3*, for which we performed  
406 an initial functional characterization in zebrafish, our screen uncovered other promising,  
407 uncharacterized candidates that may have an eye-related function. Overall, this highlights the



408 potential of comparative genomics to shed light on the functional roles of less characterized  
409 genes and to help to further identify human disease-causing genes (74).

410

411

412

## 413 **Materials and Methods**

414

### 415 **Visual acuity values**

416 We used publicly available visual acuity measurements (40, 75) (Tab. S1 lists all primary  
417 references) to classify placental mammals into visual high-acuity and low-acuity species.  
418 Visual acuity can be measured by either behavioral experiments or calculated from the eye  
419 axial diameter, the peak ganglion cell density and a correction factor for diel activity (40). For  
420 species for which both measures were available, we used the behavioral visual acuity as this  
421 measure is more accurate (40). For species that lack visual acuity data, we used available  
422 visual acuity measurements of closely related species of the same genus or family (Tab. S1).  
423 Three subterranean mammals lack available visual acuity measurements (cape golden mole,  
424 star-nosed mole, blind mole rat) but exhibit highly degenerated eyes. We therefore assumed  
425 a visual acuity of zero. In total, visual acuity values were obtained for 49 placental mammals  
426 that were included in a previously-generated whole genome alignment (76). Using a visual  
427 acuity threshold of one, we considered ten mammals (cape golden mole, naked mole rat, star-  
428 nosed mole, blind mole rat, big brown bat, little brown bat, David's myotis bat, mouse, prairie  
429 vole, deer mouse) representing seven lineages, as low-acuity vision species. All other 39  
430 species with visual acuity greater than one were considered as high-acuity vision species.

431

### 432 **Forward genomics screen**

433 To screen for genes that are preferentially lost in low-acuity placental mammals, we used a  
434 previously-generated data set of inactivated genes (33). Briefly, gene losses were detected  
435 with a pipeline that searches for gene-inactivating mutations and performs a number of filtering  
436 steps to distinguish between real mutations and artifacts related to genome assembly or  
437 alignment issues and exon-intron structure changes. A genome alignment with human (hg38  
438 assembly) as the reference (76), human genes annotated by Ensembl (version 87) (77) and  
439 principal isoforms from the APPRIS database (78) were used as input. Based on the relative  
440 positions of inactivating mutations, a value measuring the maximum percent of the reading  
441 frame that remains intact (%intact) was computed for each gene and species. A gene was  
442 classified as lost if %intact was <60%. A gene was classified as intact if %intact was  $\geq 90\%$ .

443

444 To search for genes that tend to have lower %intact values in the low-acuity group, we adopted  
445 the Forward Genomics approach (16, 33). We excluded genes that had missing data due to  
446 assembly gaps for more than 50% of low- or high-acuity species. We used phylogenetic  
447 generalized least squares (79) to account for phylogenetic relatedness and ranked genes by  
448 the Benjamini-Hochberg corrected p-value ( $FDR < 0.05$ ). We further extracted genes that tend  
449 to be conserved in high-acuity species by requiring that a gene was classified as intact in

450  $\geq 80\%$  and classified as lost in  $\leq 10\%$  of high-acuity species. Finally, to detect convergent gene  
451 losses, we required that a gene was lost in species representing at least three of the seven  
452 independent low-acuity lineages.

453

454 To test whether the identification of *SERPINE3*, which we experimentally investigated, is  
455 robust to the selected visual acuity threshold, we re-ran the screen after increasing or  
456 decreasing the threshold while keeping other parameters constant. Using a more inclusive  
457 definition of low-acuity species by increasing the visual acuity threshold to two, which  
458 additionally considered manatee, the two flying foxes and rats as low-acuity species, identified  
459 a total of six genes at an FDR of 0.05, with *SERPINE3* at the first rank (Tab. S2). Using a more  
460 restrictive definition of low-acuity species by decreasing the visual acuity threshold to 0.5  
461 identified 53 genes at an FDR of 0.05 with *SERPINE3* at rank 7 (Tab. S2).

462

### 463 **Enrichment analysis**

464 Enrichment analysis was performed using the Enrichr web service (80), which uses a two-  
465 sided Fisher's exact test and corrects for multiple testing with the Benjamini-Hochberg method.

466

### 467 **Investigating *SERPINE3* in additional genomes**

468 To explore conservation and loss of *SERPINE3* in additional mammalian genomes that  
469 became available since our initial screen, we used the TOGA method (Tool to infer Orthologs  
470 from Genome Alignments) (36). TOGA uses pairwise alignments between a reference (here  
471 human hg38) and a query genome, infers orthologous loci of a gene with a machine learning  
472 approach, and uses CESAR 2.0 (81) to align the exons of the reference gene to the  
473 orthologous locus in the query. TOGA then classifies each transcript by determining whether  
474 the central 80% of the transcript's coding sequence encodes an intact reading frame  
475 (classified as intact) or exhibits at least one gene-inactivating mutation (classified as potentially  
476 lost). If less than 50% of the coding sequence is present in the assembly, the transcript is  
477 classified as missing.

478

479 Focusing on the evolutionarily conserved human *SERPINE3* Ensembl (version 104) transcript  
480 ENST00000524365 (82), we analyzed the TOGA transcript classification for 418 assemblies  
481 that were not used in the initial screen (Tab. S4). These assemblies represent 381 new  
482 placental mammal species. For species, where TOGA classified the *SERPINE3* transcript as  
483 missing, we inspected the orthologous alignment chain to distinguish intact and lost orthologs  
484 from truly missing orthologs due to assembly gaps. Since assembly base errors can mimic  
485 false gene losses (32, 83), we further analyzed species for which only one or two inactivating  
486 mutations were detected. For these species, we require that (i) at least one inactivating  
487 mutation is shared with a closely-related species, or (ii) the mutation is also present in a  
488 different assembly of the same species. If that was not the case, we validated inactivating  
489 mutations with raw sequencing reads by aligning the genomic sequence around the mutation  
490 against the NCBI short read archive (SRA queried via NCBI megablast) (84). Intactness of  
491 *SERPINE3* remains unclear for four species (Tab. S4). In order to map *SERPINE3* loss events

492 on the phylogenetic tree, we searched for gene-inactivating mutations that are shared among  
493 phylogenetically related species, where parsimony indicates that these mutations and thus  
494 gene loss likely occurred in their common ancestor. Those mutations are shown in boxes in  
495 Fig. S1-7, all other mutations are the output of CESAR.

496

#### 497 **Selection analysis**

498 For species with an unclear *SERPINE3* loss status (mole vole, steenbok, okapi, fox, Steller's  
499 sea cow) and species or clades that have an intact *SERPINE3* but many close relatives have  
500 lost the gene (greater sac-winged bat, European hedgehog, elephants), we tested whether  
501 *SERPINE3* evolves under relaxed selection. To this end, we used RELAX from the HyPhy  
502 suite (85) to test whether selection pressure was relaxed (selection intensity parameter  $K < 1$ )  
503 or intensified ( $K > 1$ ) in this species or clade, which we labeled as foreground (Tab. S5). We  
504 restricted the analysis to 327 *SERPINE3* that are intact and complete (middle 80% of the  
505 coding sequence present) and treated those as background. Codon sequences were obtained  
506 from TOGA and aligned with MACSE v2.0 (86). This procedure was repeated using only one  
507 foreground species/clade at the time. The species tree used for the analysis is in Data set S2.

508

#### 509 **Protein sequence analysis and structure prediction**

510 Signal peptides and the cellular location were predicted with the SignalP 5.0 webserver (87)  
511 and DeepLoc 1 (88), respectively, for all intact and complete *SERPINE3* protein sequences  
512 as defined above. Protein sequences were aligned with muscle (89) and visualized with  
513 Jalview (90) (Data set S3).

514

515 The three-dimensional structure of human *SERPINE3* was retrieved from the AlphaFold2 web  
516 server (91) (Data set S4). We calculated the root mean square distance (RMSD) to all  
517 homologous chains of existing crystal structures of close serpin relatives in native state (Tab.  
518 S9) after structural alignment in PyMOL (92). For each crystal structure, we averaged the  
519 RMSD for all chains.

520

#### 521 **Mining gene function, expression and genetic variation sources**

522 Information on the function of genes discovered in our screen was obtained from GeneCards  
523 database (93), UniProt (94), Ensembl (82), Proteomics DB (95), the Human protein atlas (96),  
524 the Expression atlas and Single cell expression atlas (97). Expression in human eye for each  
525 candidate gene were obtained by averaging expression over all healthy, primary RNA-Seq  
526 data sets per tissue (cornea, RPE, retina) provided by the eyeIntegration database (98). Cell  
527 lines were not included in the average. A gene was considered to be expressed if the  
528 Transcripts Per Million (TPM) value was  $> 100$  in cornea, RPE, or retina. Expression of  
529 *SERPINE3* was further assessed by retrieving primary data sets from FantomCat (99), GEO  
530 profiles (100), and Bgee (101). Tab. S6 provides the list of all data sets.

531

532 Phenotype associations of SNPs located in loci of interest were investigated based on the  
533 GWAS catalog (102), dbSNP (103) and PheGenI (104). Linkage of SNPs with a candidate

534 gene in 30 human populations was investigated based on the GWAS catalog. To evaluate  
535 possible functional consequences of the respective SNPs, we overlapped their (projected)  
536 coordinates with regulatory elements from ENCODE for human (hg38) and mouse (mm10) via  
537 the web-based server SCREEN v. 2020-10 (105). Additionally, we investigated eye- and  
538 retina-associated regulatory elements in the Ensembl and UCSC genome browsers (82, 106).  
539

#### 540 **Animal husbandry**

541 Adult zebrafish (*Danio rerio*, AB line) were maintained at 26.5°C with a 10/14 h dark/light cycle  
542 (107). Embryos and larvae were raised at 28.5°C in the dark until six days old. For  
543 phenotyping, we used adult fish of both *serpine3* KO lines (*serpine3*<sup>cbg17</sup>:19 months,  
544 *serpine3*<sup>cbg18</sup>: 11 months) generated in this study as well as their WT siblings. WT mice (*Mus*  
545 *musculus*, C57BL/6J0laHsd line) were maintained in a barrier system at 20-24°C with a 12/12  
546 h dark/light cycle.

547

#### 548 **Expression analysis by RT-qPCR**

549 Adult zebrafish >12 months were sacrificed by rapid cooling after anesthesia with MESAB.  
550 Adult mice (2 months, male) were sacrificed by cranial dislocation after carbon dioxide  
551 anesthesia. Tissues were dissected in ice-cold phosphate buffer (PBS), frozen in liquid  
552 nitrogen and stored at -80°C until further use. RNA was extracted from lysed, homogenized  
553 tissue with RNeasy mini or midi kits (Qiagen) according to manufacturer's instructions and  
554 reprecipitated if necessary. The RNA Integrity Number (RIN) was >7 for all tissues except  
555 spleen (RIN>6). Intact total RNA was reverse transcribed into cDNA using the ProtoScript® II  
556 First Strand cDNA Synthesis Kit (NEB) according to manufacturer's instructions with random  
557 primers. RT-qPCR was performed after addition of SybrGreen (Roche). Expression relative to  
558 a normalization gene was calculated from Ct values according to the efficiency and delta delta  
559 Ct method. Specifically, relative ratios of *Serpine3/serpine3* expression (zebrafish forward:  
560 GAGACCCAAAACCTGCCCTT, reverse: AGCCGGAAATGACCGATATTGA, mouse forward:  
561 TGGAGCTTTCAGAGGAGGGTA, reverse: GATACTGAAGACAAACCCTGTGC) were  
562 obtained by using *rpl13a* (forward: TCTGGAGGAACTGTAAGAGGTATGC, reverse:  
563 AGACGCACAATCTTGAGAGCGA) or *actb* (forward: CGAGCAGGAGATGGGAACC,  
564 reverse: CAACGGAAACGCTCATTGC) as reference gene for zebrafish and *Rpl27* as  
565 reference gene for mouse (forward: TTGAGGAGCGATACAAGACAGG, reverse:  
566 CCCAGTCTCTTCCCACACAAA). At least three biological replicates per sample group were  
567 analyzed, which were each represented by the average normalized relative ratio of three to  
568 six technical replicates.

569

#### 570 **ISH and FISH**

571 For ISH and immunostainings, fish were scarified, eyes dissected and fixed in 4%  
572 paraformaldehyde/ 0.1 M PBS after removal of the lens. Eyes were embedded in  
573 gelatin/sucrose and sectioned (14 µm) with a cryostat. The *serpine3 in situ* probe spans the  
574 coding exons 3-8 (transcript: ENSDART00000132915.2). Using primers with restriction  
575 enzyme cut sites (forward, Not1: TAAGCA GC

576 GGCCGCGTAAAAGTGCCCATGATGTACCAG, reverse, BamHI: TAAGCA G GATCC  
577 ACAACTCGACCTATAAACAGCAAC), *serpine3* cDNA was amplified from total cDNA and  
578 cloned into the pCRII-topo vector (Invitrogen). The antisense probes were transcribed with  
579 SP6 polymerase, using a DIG-labeled NTP mix (Roche diagnostics). The (fluorescent) ISH  
580 were conducted as previously described with minor modifications (108): Hybridization and  
581 washing steps were performed at 60°C. For chromogenic *in situ*s, sections were incubated  
582 with anti-digoxigenin-AP (Roche), diluted 1:4000 in DIG-blocking reagent (Roche) at 4°C  
583 overnight and subsequently developed with NBT/BCIP (Roche). For FISH, sections were  
584 washed in PBS immediately after quenching. Sections were blocked for 1 h with 2% blocking  
585 reagent in MABT (Perkin-Elmer) and then incubated with anti-digoxigenin-POD (Roche),  
586 diluted 1:500. The signal was detected with the TSA Plus Cy3/Cy5 kit (Perkin-Elmer).

587

### 588 **Immunohistochemistry**

589 Immunostainings for glial fibrillary acidic protein (ZRF1 from DSHB, 1:200), choline O-  
590 acetyltransferase (AB144P from Millipore, 1:500) and protein kinase C alpha (SC-208 from  
591 Santa-Cruz, 1:500) were performed after completion of the FISH protocol according to (108).  
592 For chat, antigens were retrieved in preheated 10 mM sodium citrate buffer for 6' at 85°C.  
593 Sections were washed in PBS and 0.3% PBSTx prior to primary antibody incubation. Following  
594 the protocol of (108), we washed the sections three times in PBSTx, and incubated in anti-  
595 goat or anti-rabbit IgG (H+L) Alexa 488-conjugated secondary antibodies (Invitrogen, 1:750).

596

### 597 **Generation of KO lines and genotyping**

598 To generate *serpine3* KO lines, deletions were introduced using the CRISPR-Cas9 system.  
599 Guides were chosen considering efficiency predictions of the IDT DNA CRISPR-Cas9 guide  
600 checker and ChopChopV2 (109) on the zebrafish assembly danRer7 and ordered as Alt-R  
601 CRISPR-Cas crRNA from IDT DNA. For each line, three guides were simultaneously injected  
602 into one-cell stage zebrafish embryos as ribonucleoprotein delivery using the Alt-R CRISPR-  
603 Cas system following the manufacturer's instructions (0.5 fmol crRNA per embryo per guide,  
604 0.68 ng Cas9 protein per embryo). The expected deletions were confirmed by Sanger  
605 sequencing in several founder individuals, one of which was chosen as the founder of each  
606 line (Fig. S12). Heterozygous *cbg17* and *cbg18* zebrafish were further outcrossed to WT fish  
607 for several generations and then bred to homozygosity.

608

609 More specifically, for *serpine3*<sup>*cbg17*</sup>, we abolished *serpine3* transcription by deleting the single  
610 transcription start site, which is supported by activating histone marks in zebrafish and is also  
611 well conserved in human and mouse (Fig. S12A, using the following guides:  
612 GGTATTTGTA CTCTAATGAA (guide 1), TGTACTCTAATGAAAGGAAC (guide 2),  
613 CTCACACAGGACAATCCGGCAGG (guide 3). For genotyping, we used primers (forward 1:  
614 5-GAAATCGCATGTCACGCAGAAAT-3, reverse 2: 5-ATATCGGAACTGACATACTGAACG-  
615 3, reverse 2.2: 5- GTGAGCTTCGTGTTTGTGGT-3) to amplify a region around the  
616 transcription start site.

617



618 *Serpine3*<sup>cbg18</sup> was generated by introducing a frame shifting deletion in coding exon 1, which  
619 presumably results in three early stop codons when the transcript is translated. The following  
620 guides were used: TCTTCTGCAACTCGGGGCCA (guide 4), TCTCTGTGAGCGTCTGGTAG  
621 (guide 5), AACACTCTGGTTCAGCTCGA (guide 6) (Fig. S12). We genotyped fish by  
622 amplifying a region around coding exon1 with the following primers: forward 3: 5-  
623 GGCATTGTTGAGATTTCAGTAGTCA-3, reverse 4: 5-CAGTTTACTCCTACCATTGACATC-3.  
624

## 625 **Histology**

626 For hematoxylin/eosin stainings, fish were sacrificed and heads were fixed overnight at 4°C in  
627 4% paraformaldehyde/ 0.1 M PBS and decalcified in 0.5 M EDTA in 0.1 M PBS for 3-4 days.  
628 Next, they were processed in a Paraffin-Infiltration-Processor (STP 420, Zeiss) according to  
629 the following program: ddH<sub>2</sub>O: 1×1'; 50% ethanol (EtOH) 1×5'; 70% EtOH 1×10'; 96% EtOH  
630 1×25'; 96% EtOH 2×20'; 100% EtOH 2×20'; xylene 2×20'; paraffin 3×40'/60°C; paraffin  
631 1×60'/60°C. The heads were embedded in paraffin using the Embedding Center EG1160  
632 (Leica). Semi-thin sections (2 μm) were cut on an Ultracut microtome (Mikrom) and  
633 counterstained using hematoxylin/eosin (HE, Sigma).  
634

## 635 **Microscopy, image processing and analysis**

636 Imaging was performed using the ZEISS Axio Imager.Z1 provided by the CMCB Light  
637 Microscopy Facility. The images were processed in Fiji/ImageJ version 2.1.0 (110)  
638 (macroscopic eye images) and Adobe Illustrator. For macroscopic phenotyping, eyes were  
639 imaged with a Leica stereo microscope M165C. To parameterize the eye shape, the eye  
640 outline was first approximated by an oval and then manually corrected if necessary. Particle  
641 parameters of the final eye object were measured automatically in Fiji. The statistical analysis  
642 and visualization were conducted in R version 4.1.0 (2021-05-18) using the packages ggplot2  
643 (111) and tseries (112). Comparing WT and KO individuals, we tested whether both genotypes  
644 have the same iris shape (estimated by iris solidity and circularity) using the Wilcoxon rank  
645 sum test after rejecting normality of the variables with a Jarque Bera Test. Both eyes of the  
646 same individual were treated as individual biological replicates, since we observed shape  
647 deviations often only in one eye of the same individual (Tab. S7).  
648

## 649 **Animal licenses**

650 All experiments in mouse and zebrafish were performed in accordance with the German  
651 animal welfare legislation. Protocols were approved by the Institutional Animal Welfare Officer  
652 (Tierschutzbeauftragter), and licensed by the regional Ethical Commission for Animal  
653 Experimentation (Landesdirektion Sachsen, Germany; license no. DD24-5131/354/11,  
654 DD24.1-5131/451/8, DD24-5131/346/11, DD24-5131/346/12).  
655

656



657 **Data availability**

658 All data needed to evaluate the conclusions in the paper are present in the paper and the  
659 Supplementary Materials. The phylogenetic tree used for the selection, the annotated protein  
660 alignment of mammalian SERPINE3, and the predicted structure of human SERPINE3 is  
661 available at <https://genome.senckenberg.de/download/SERPINE3/>.

662

663 **Competing interests**

664 The authors have no competing interests.

665

666 **Acknowledgment**

667 We thank the genomics community for sequencing and assembling the genomes and the  
668 UCSC genome browser group for providing software and genome annotations. Experimental  
669 work would not have been possible (or as pleasant) without supporting hosting labs, especially  
670 Nadine Vastenhouw, Elisabeth Knust and Wieland Huttner. We also thank Nadine  
671 Vastenhouw and her whole lab, Michael Heide and Mauricio Rocha as well as current and  
672 former members of the Hiller lab for helpful scientific discussion and comments on the  
673 manuscript. We thank the following facilities of MPI-CBG: Biomedical Services (especially fish  
674 unit), Cell technologies (Julia Jarrells), Sequencing and genotyping (Sylke Winkler), Light  
675 Microscopy, Scientific Computing, Computer Service Facilities as well as the Computer  
676 Service Facilities of MPI-PKS and the CMCB Histology (Susanne Weiche) and CMCB Light  
677 Microscopy Facility for their support. Work of HI and MH was supported by an exploration  
678 grant from the Boehringer Ingelheim Stiftung, the Max Planck Society and the LOEWE-Centre  
679 for Translational Biodiversity Genomics (TBG) funded by the Hessen State Ministry of Higher  
680 Education, Research and the Arts (HMWK). Work by JH, AM, SH and MB was supported by  
681 project grants of the German Research Foundation (Deutsche Forschungsgemeinschaft,  
682 project numbers BR 1746/3 and BR 1746/6) and an ERC advanced grant (Zf-BrainReg) to  
683 MB. This study was furthermore supported with a PhD scholarship from Studienstiftung des  
684 deutschen Volkes to JH.

685

686

## 687 References

- 688 1. V. C. Sheffield, E. M. Stone, Genomics and the eye. *N Engl J Med* **364**, 1932-1942  
689 (2011).
- 690 2. K. Allison, D. Patel, O. Alabi, Epidemiology of Glaucoma: The Past, Present, and  
691 Predictions for the Future. *Cureus* **12**, e11686 (2020).
- 692 3. P. Mitchell, G. Liew, B. Gopinath, T. Y. Wong, Age-related macular degeneration.  
693 *Lancet* **392**, 1147-1159 (2018).
- 694 4. G. B. a. V. I. Collaborators, V. L. E. G. o. t. G. B. o. D. Study, Causes of blindness and  
695 vision impairment in 2020 and trends over 30 years, and prevalence of avoidable  
696 blindness in relation to VISION 2020: the Right to Sight: an analysis for the Global  
697 Burden of Disease Study. *Lancet Glob Health* **9**, e144-e160 (2021).
- 698 5. B. A. Moore *et al.*, Identification of genes required for eye development by high-  
699 throughput screening of mouse knockouts. *Commun Biol* **1**, 236 (2018).
- 700 6. S. P. Daiger, L. S. Sullivan, S. J. Browne (2021) RetNet - Retinal Information Network.
- 701 7. L. Wang *et al.*, A new locus for inherited nuclear cataract mapped to the long arm of  
702 chromosome 1. *Mol Vis* **13**, 1357-1362 (2007).
- 703 8. N. Sabir *et al.*, Mapping of a novel locus associated with autosomal recessive  
704 congenital cataract to chromosome 8p. *Mol Vis* **16**, 2911-2915 (2010).
- 705 9. H. Abouzeid *et al.*, A new locus for congenital cataract, microcornea, microphthalmia,  
706 and atypical iris coloboma maps to chromosome 2. *Ophthalmology* **116**, 154-162 e151  
707 (2009).
- 708 10. A. Shiels, T. M. Bennett, J. F. Hejtmancik, Cat-Map: putting cataract on the map. *Mol*  
709 *Vis* **16**, 2007-2015 (2010).
- 710 11. C. A. Emerling, A. D. Widjaja, N. N. Nguyen, M. S. Springer, Their loss is our gain:  
711 regressive evolution in vertebrates provides genomic models for uncovering human  
712 disease loci. *J Med Genet* **54**, 787-794 (2017).
- 713 12. V. Sharma, M. Hiller, Losses of human disease-associated genes in placental  
714 mammals. *NAR Genom Bioinform* **2**, lqz012 (2020).
- 715 13. E. B. Kim *et al.*, Genome sequencing reveals insights into physiology and longevity of  
716 the naked mole rat. *Nature* **479**, 223-227 (2011).
- 717 14. X. Fang *et al.*, Adaptations to a subterranean environment and longevity revealed by  
718 the analysis of mole rat genomes. *Cell Rep* **8**, 1354-1364 (2014).
- 719 15. C. A. Emerling, M. S. Springer, Eyes underground: regression of visual protein  
720 networks in subterranean mammals. *Mol Phylogenet Evol* **78**, 260-270 (2014).
- 721 16. X. Prudent, G. Parra, P. Schwede, J. G. Roscito, M. Hiller, Controlling for Phylogenetic  
722 Relatedness and Evolutionary Rates Improves the Discovery of Associations Between  
723 Species' Phenotypic and Genomic Differences. *Mol Biol Evol* **33**, 2135-2150 (2016).
- 724 17. R. Partha *et al.*, Subterranean mammals show convergent regression in ocular genes  
725 and enhancers, along with adaptation to tunneling. *Elife* **6** (2017).
- 726 18. C. A. Emerling, Regressed but Not Gone: Patterns of Vision Gene Loss and Retention  
727 in Subterranean Mammals. *Integr Comp Biol* **58**, 441-451 (2018).
- 728 19. R. W. Meredith, J. Gatesy, C. A. Emerling, V. M. York, M. S. Springer, Rod  
729 monochromacy and the coevolution of cetacean retinal opsins. *PLoS Genet* **9**,  
730 e1003432 (2013).
- 731 20. H. Zhao *et al.*, The evolution of color vision in nocturnal mammals. *Proc Natl Acad Sci*  
732 *U S A* **106**, 8980-8985 (2009).
- 733 21. C. A. Emerling, M. S. Springer, Genomic evidence for rod monochromacy in sloths and  
734 armadillos suggests early subterranean history for Xenarthra. *Proc Biol Sci* **282**,  
735 20142192 (2015).
- 736 22. A. Sadier *et al.*, Multifactorial processes underlie parallel opsin loss in neotropical bats.  
737 *Elife* **7** (2018).
- 738 23. M. S. Springer *et al.*, Inactivation of Cone-Specific Phototransduction Genes in Rod  
739 Monochromatic Cetaceans. *Frontiers in Ecology and Evolution* **4**, 61 (2016).

- 740 24. J. G. Roscito *et al.*, Phenotype loss is associated with widespread divergence of the  
741 gene regulatory landscape in evolution. *Nat Commun* **9**, 4737 (2018).
- 742 25. B. E. Langer, J. G. Roscito, M. Hiller, REforge Associates Transcription Factor Binding  
743 Site Divergence in Regulatory Elements with Phenotypic Differences between  
744 Species. *Mol Biol Evol* **35**, 3027-3040 (2018).
- 745 26. B. E. Langer, M. Hiller, TFforge utilizes large-scale binding site divergence to identify  
746 transcriptional regulators involved in phenotypic differences. *Nucleic Acids Res* **47**,  
747 e19 (2019).
- 748 27. J. G. Roscito *et al.*, Recapitulating Evolutionary Divergence in a Single Cis-Regulatory  
749 Element Is Sufficient to Cause Expression Changes of the Lens Gene Tdrd7. *Mol Biol*  
750 *Evol* **38**, 380-392 (2021).
- 751 28. T. Stephan *et al.*, Darwinian genomics and diversity in the tree of life. *Proc Natl Acad*  
752 *Sci U S A* **119** (2022).
- 753 29. M. Hiller *et al.*, A "forward genomics" approach links genotype to phenotype using  
754 independent phenotypic losses among related species. *Cell Rep* **2**, 817-823 (2012).
- 755 30. E. M. Caves, N. C. Brandley, S. Johnsen, Visual Acuity and the Evolution of Signals.  
756 *Trends Ecol Evol* **33**, 358-372 (2018).
- 757 31. N. Hecker, U. Lachele, H. Stuckas, P. Giere, M. Hiller, Convergent vomeronasal  
758 system reduction in mammals coincides with convergent losses of calcium signalling  
759 and odorant-degrading genes. *Mol Ecol* **28**, 3656-3668 (2019).
- 760 32. N. Hecker, V. Sharma, M. Hiller, Convergent gene losses illuminate metabolic and  
761 physiological changes in herbivores and carnivores. *Proc Natl Acad Sci U S A* **116**,  
762 3036-3041 (2019).
- 763 33. V. Sharma *et al.*, A genomics approach reveals insights into the importance of gene  
764 losses for mammalian adaptations. *Nat Commun* **9**, 1215 (2018).
- 765 34. M. Uhlen *et al.*, Towards a knowledge-based Human Protein Atlas. *Nat Biotechnol* **28**,  
766 1248-1250 (2010).
- 767 35. K. N. Jha *et al.*, Identification of a novel HSP70-binding cochaperone critical to HSP90-  
768 mediated activation of small serine/threonine kinase. *J Biol Chem* **285**, 35180-35187  
769 (2010).
- 770 36. B. M. Kirilenko *et al.*, TOGA integrates gene annotation with orthology inference at  
771 scale.
- 772 37. R. A. Mittermeier, D. E. Wilson, *Hoofed animals*, Handbook of the Mammals of the  
773 World (Barcelona, 2011).
- 774 38. P. Myers *et al.* (2022) The Animal Diversity Web (online).
- 775 39. J. D. DiPaola, M. Yindee, J. M. Plotnik, Investigating the use of sensory information to  
776 detect and track prey by the Sunda pangolin (*Manis javanica*) with conservation in  
777 mind. *Sci Rep* **10**, 9787 (2020).
- 778 40. C. C. Veilleux, E. C. Kirk, Visual acuity in mammals: effects of eye size and ecology.  
779 *Brain Behav Evol* **83**, 43-53 (2014).
- 780 41. T. Gaudin, D. A. Croft, Paleogene Xenarthra and the evolution of South American  
781 mammals. *Journal of Mammalogy* **96**, 622-634 (2015).
- 782 42. B. M. Siemers, G. Schauer mann, H. Turni, S. von Merten, Why do shrews twitter?  
783 Communication or simple echo-based orientation. *Biol Lett* **5**, 593-596 (2009).
- 784 43. E. Gould, Evidence for Echolocation in the Tenrecidae of Madagascar. *P Am Philos*  
785 *Soc* **109**, 352-360 (1965).
- 786 44. J. Eisenberg, E. Gould, The behaviour of *Solenodon paradoxus* in captivity with  
787 comments in the behavior of the insectivora. *Zoologica-New York* **51**, 49-58 (1966).
- 788 45. A. M. Moore, A. Hartstone-Rose, D. Gonzalez-Socoloske, Review of sensory  
789 modalities of sirenians and the other extant Paenungulata clade. *Anat Rec (Hoboken)*  
790 10.1002/ar.24741  
791 10.1002/ar.24741. (2021).
- 792 46. A. M. Mass, D. R. Ketten, D. K. Odell, A. Y. Supin, Ganglion cell distribution and retinal  
793 resolution in the Florida manatee, *Trichechus manatus latirostris*. *Anat Rec (Hoboken)*  
794 **295**, 177-186 (2012).

- 795 47. J. D. Pettigrew, A. Bhagwandin, M. Haagensen, P. R. Manger, Visual acuity and  
796 heterogeneities of retinal ganglion cell densities and the tapetum lucidum of the African  
797 elephant (*Loxodonta africana*). *Brain Behav Evol* **75**, 251-261 (2010).
- 798 48. C. M. Dengler-Crish, S. D. Crish, M. J. O'Riain, K. C. Catania, Organization of the  
799 somatosensory cortex in elephant shrews (*E. edwardii*). *Anat Rec A Discov Mol Cell*  
800 *Evol Biol* **288**, 859-866 (2006).
- 801 49. J. Wu, T. Yonezawa, H. Kishino, Rates of Molecular Evolution Suggest Natural History  
802 of Life History Traits and a Post-K-Pg Nocturnal Bottleneck of Placentals. *Curr Biol* **27**,  
803 3025-3033 e3025 (2017).
- 804 50. C. Heit *et al.*, Update of the human and mouse SERPIN gene superfamily. *Hum*  
805 *Genomics* **7**, 22 (2013).
- 806 51. R. H. Law *et al.*, An overview of the serpin superfamily. *Genome Biol* **7**, 216 (2006).
- 807 52. C. J. Barnstable, J. Tombran-Tink, Neuroprotective and antiangiogenic actions of  
808 PEDF in the eye: molecular targets and therapeutic potential. *Prog Retin Eye Res* **23**,  
809 561-577 (2004).
- 810 53. A. Machalinska *et al.*, Long-term neuroprotective effects of NT-4-engineered  
811 mesenchymal stem cells injected intravitreally in a mouse model of acute retinal injury.  
812 *Invest Ophthalmol Vis Sci* **54**, 8292-8305 (2013).
- 813 54. D. Roginska *et al.*, Depletion of the Third Complement Component Ameliorates Age-  
814 Dependent Oxidative Stress and Positively Modulates Autophagic Activity in Aged  
815 Retinas in a Mouse Model. *Oxid Med Cell Longev* **2017**, 5306790 (2017).
- 816 55. B. M. Kevany, N. Zhang, B. Jastrzebska, K. Palczewski, Animals deficient in C2Orf71,  
817 an autosomal recessive retinitis pigmentosa-associated locus, develop severe early-  
818 onset retinal degeneration. *Hum Mol Genet* **24**, 2627-2640 (2015).
- 819 56. J. M. Fadool, Development of a rod photoreceptor mosaic revealed in transgenic  
820 zebrafish. *Dev Biol* **258**, 277-290 (2003).
- 821 57. P. W. M. Bonnemaier *et al.*, Multi-trait genome-wide association study identifies new  
822 loci associated with optic disc parameters. *Commun Biol* **2**, 435 (2019).
- 823 58. Q. Fan *et al.*, Genome-wide association meta-analysis of corneal curvature identifies  
824 novel loci and shared genetic influences across axial length and refractive error.  
825 *Commun Biol* **3**, 133 (2020).
- 826 59. A. Reichenbach, A. Bringmann, New functions of Muller cells. *Glia* **61**, 651-678 (2013).
- 827 60. A. Bringmann *et al.*, Cellular signaling and factors involved in Muller cell gliosis:  
828 neuroprotective and detrimental effects. *Prog Retin Eye Res* **28**, 423-451 (2009).
- 829 61. W. Shen *et al.*, Conditional Müllercell ablation causes independent neuronal and  
830 vascular pathologies in a novel transgenic model. *J Neurosci* **32**, 15715-15727 (2012).
- 831 62. R. R. Klimczak, J. T. Koerber, D. Dalkara, J. G. Flannery, D. V. Schaffer, A novel  
832 adeno-associated viral variant for efficient and selective intravitreal transduction of rat  
833 Muller cells. *PLoS One* **4**, e7467 (2009).
- 834 63. T. Hoang *et al.*, Gene regulatory networks controlling vertebrate retinal regeneration.  
835 *Science* **370** (2020).
- 836 64. M. Hadziahmetovic *et al.*, Microarray analysis of murine retinal light damage reveals  
837 changes in iron regulatory, complement, and antioxidant genes in the neurosensory  
838 retina and isolated RPE. *Invest Ophthalmol Vis Sci* **53**, 5231-5241 (2012).
- 839 65. C. S. Cowan *et al.*, Cell Types of the Human Retina and Its Organoids at Single-Cell  
840 Resolution. *Cell* **182**, 1623-1640 e1634 (2020).
- 841 66. A. M. Newman *et al.*, Systems-level analysis of age-related macular degeneration  
842 reveals global biomarkers and phenotype-specific functional networks. *Genome Med*  
843 **4**, 16 (2012).
- 844 67. M. J. Radeke *et al.*, Restoration of mesenchymal retinal pigmented epithelial cells by  
845 TGF $\beta$  pathway inhibitors: implications for age-related macular degeneration. *Genome*  
846 *Med* **7**, 58 (2015).
- 847 68. N. C. Boles *et al.*, Epigenomic and Transcriptomic Changes During Human RPE EMT  
848 in a Stem Cell Model of Epiretinal Membrane Pathogenesis and Prevention by  
849 Nicotinamide. *Stem Cell Reports* **14**, 631-647 (2020).



- 850 69. S. R. Sripathi *et al.*, Proteome Landscape of Epithelial-to-Mesenchymal Transition  
851 (EMT) of Retinal Pigment Epithelium Shares Commonalities With Malignancy-  
852 Associated EMT. *Mol Cell Proteomics* **20**, 100131 (2021).
- 853 70. J. Liobikas *et al.*, Expression and purification of the mitochondrial serine protease  
854 LACTB as an N-terminal GST fusion protein in *Escherichia coli*. *Protein Expr Purif* **45**,  
855 335-342 (2006).
- 856 71. P. G. Hysi *et al.*, Meta-analysis of 542,934 subjects of European ancestry identifies  
857 new genes and mechanisms predisposing to refractive error and myopia. *Nat Genet*  
858 **52**, 401-407 (2020).
- 859 72. W. Chen *et al.*, Genetic variants near TIMP3 and high-density lipoprotein-associated  
860 loci influence susceptibility to age-related macular degeneration. *Proc Natl Acad Sci U*  
861 *S A* **107**, 7401-7406 (2010).
- 862 73. C. Y. Chiang *et al.*, Novel eye genes systematically discovered through an integrated  
863 analysis of mouse transcriptomes and phenome. *Comput Struct Biotechnol J* **18**, 73-  
864 82 (2020).
- 865 74. J. R. S. Meadows, K. Lindblad-Toh, Dissecting evolution and disease using  
866 comparative vertebrate genomics. *Nat Rev Genet* **18**, 624-636 (2017).
- 867 75. A. D. Kemp, E. Christopher Kirk, Eye size and visual acuity influence vestibular  
868 anatomy in mammals. *Anat Rec (Hoboken)* **297**, 781-790 (2014).
- 869 76. V. Sharma, M. Hiller, Increased alignment sensitivity improves the usage of genome  
870 alignments for comparative gene annotation. *Nucleic Acids Res* **45**, 8369-8377 (2017).
- 871 77. B. L. Aken *et al.*, Ensembl 2017. *Nucleic Acids Res* **45**, D635-D642 (2017).
- 872 78. J. M. Rodriguez *et al.*, APPRIS 2017: principal isoforms for multiple gene sets. *Nucleic*  
873 *Acids Res* **46**, D213-D217 (2018).
- 874 79. R. P. Freckleton, P. H. Harvey, M. Pagel, Phylogenetic analysis and comparative data:  
875 a test and review of evidence. *Am Nat* **160**, 712-726 (2002).
- 876 80. M. V. Kuleshov *et al.*, Enrichr: a comprehensive gene set enrichment analysis web  
877 server 2016 update. *Nucleic Acids Res* **44**, W90-97 (2016).
- 878 81. V. Sharma, P. Schwede, M. Hiller, CESAR 2.0 substantially improves speed and  
879 accuracy of comparative gene annotation. *Bioinformatics* **33**, 3985-3987 (2017).
- 880 82. K. L. Howe *et al.*, Ensembl 2021. *Nucleic Acids Res* **49**, D884-D891 (2021).
- 881 83. V. Sharma, N. Hecker, F. Walther, H. Stuckas, M. Hiller, Convergent Losses of TLR5  
882 Suggest Altered Extracellular Flagellin Detection in Four Mammalian Lineages. *Mol*  
883 *Biol Evol* **37**, 1847-1854 (2020).
- 884 84. R. Leinonen, H. Sugawara, M. Shumway, C. International Nucleotide Sequence  
885 Database, The sequence read archive. *Nucleic Acids Res* **39**, D19-21 (2011).
- 886 85. J. O. Wertheim, B. Murrell, M. D. Smith, S. L. Kosakovsky Pond, K. Scheffler, RELAX:  
887 detecting relaxed selection in a phylogenetic framework. *Mol Biol Evol* **32**, 820-832  
888 (2015).
- 889 86. V. Ranwez, E. J. P. Douzery, C. Cambon, N. Chantret, F. Delsuc, MACSE v2: Toolkit  
890 for the Alignment of Coding Sequences Accounting for Frameshifts and Stop Codons.  
891 *Mol Biol Evol* **35**, 2582-2584 (2018).
- 892 87. J. J. Almagro Armenteros *et al.*, SignalP 5.0 improves signal peptide predictions using  
893 deep neural networks. *Nat Biotechnol* **37**, 420-423 (2019).
- 894 88. J. J. Almagro Armenteros, C. K. Sønderby, S. K. Sønderby, H. Nielsen, O. Winther,  
895 DeepLoc: prediction of protein subcellular localization using deep learning.  
896 *Bioinformatics* **33**, 3387-3395 (2017).
- 897 89. R. C. Edgar, MUSCLE: multiple sequence alignment with high accuracy and high  
898 throughput. *Nucleic Acids Res* **32**, 1792-1797 (2004).
- 899 90. A. M. Waterhouse, J. B. Procter, D. M. Martin, M. Clamp, G. J. Barton, Jalview Version  
900 2--a multiple sequence alignment editor and analysis workbench. *Bioinformatics* **25**,  
901 1189-1191 (2009).
- 902 91. J. Jumper *et al.*, Highly accurate protein structure prediction with AlphaFold. *Nature*  
903 **596**, 583-589 (2021).
- 904 92. L. L. C. Schrödinger, W. DeLano (The PyMOL Molecular Graphics System).

- 905 93. G. Stelzer *et al.*, The GeneCards Suite: From Gene Data Mining to Disease Genome  
906 Sequence Analyses. *Curr Protoc Bioinformatics* **54**, 1 30 31-31 30 33 (2016).
- 907 94. U. Consortium, UniProt: the universal protein knowledgebase in 2021. *Nucleic Acids*  
908 *Res* **49**, D480-D489 (2021).
- 909 95. P. Samaras *et al.*, ProteomeDB: a multi-omics and multi-organism resource for life  
910 science research. *Nucleic Acids Res* **48**, D1153-D1163 (2020).
- 911 96. M. Uhlen *et al.*, The human secretome. *Sci Signal* **12** (2019).
- 912 97. I. Papatheodorou *et al.*, Expression Atlas update: from tissues to single cells. *Nucleic*  
913 *Acids Res* **48**, D77-D83 (2020).
- 914 98. J. M. Bryan *et al.*, Identifying core biological processes distinguishing human eye  
915 tissues with precise systems-level gene expression analyses and weighted correlation  
916 networks. *Hum Mol Genet* **27**, 3325-3339 (2018).
- 917 99. C. C. Hon *et al.*, An atlas of human long non-coding RNAs with accurate 5' ends.  
918 *Nature* **543**, 199-204 (2017).
- 919 100. T. Barrett *et al.*, NCBI GEO: archive for functional genomics data sets--update. *Nucleic*  
920 *Acids Res* **41**, D991-995 (2013).
- 921 101. F. B. Bastian *et al.*, The Bgee suite: integrated curated expression atlas and  
922 comparative transcriptomics in animals. *Nucleic Acids Res* **49**, D831-D847 (2021).
- 923 102. J. MacArthur *et al.*, The new NHGRI-EBI Catalog of published genome-wide  
924 association studies (GWAS Catalog). *Nucleic Acids Res* **45**, D896-D901 (2017).
- 925 103. S. T. Sherry *et al.*, dbSNP: the NCBI database of genetic variation. *Nucleic Acids Res*  
926 **29**, 308-311 (2001).
- 927 104. E. M. Ramos *et al.*, Phenotype-Genotype Integrator (PheGenI): synthesizing genome-  
928 wide association study (GWAS) data with existing genomic resources. *Eur J Hum*  
929 *Genet* **22**, 144-147 (2014).
- 930 105. E. P. Consortium *et al.*, Expanded encyclopaedias of DNA elements in the human and  
931 mouse genomes. *Nature* **583**, 699-710 (2020).
- 932 106. B. T. Lee *et al.*, The UCSC Genome Browser database: 2022 update. *Nucleic Acids*  
933 *Res* 10.1093/nar/gkab959 (2021).
- 934 107. M. Brand, M. Granato, "Keeping and raising zebrafish" in Zebrafish: A practical  
935 approach, C. Nüsslein-Volhard, R. Dahm, Eds. (Oxford University Press, 2002),  
936 chap. 1.
- 937 108. V. de Oliveira-Carlos, J. Ganz, S. Hans, J. Kaslin, M. Brand, Notch receptor expression  
938 in neurogenic regions of the adult zebrafish brain. *PLoS One* **8**, e73384 (2013).
- 939 109. K. Labun, T. G. Montague, J. A. Gagnon, S. B. Thyme, E. Valen, CHOPCHOP v2: a  
940 web tool for the next generation of CRISPR genome engineering. *Nucleic Acids Res*  
941 **44**, W272-276 (2016).
- 942 110. J. Schindelin *et al.*, Fiji: an open-source platform for biological-image analysis. *Nat*  
943 *Methods* **9**, 676-682 (2012).
- 944 111. H. Wickham, *ggplot2: Elegant Graphics for Data Analysis* (Springer-Verlag New York,  
945 2016).
- 946 112. A. Trapletti, K. Hornik (2021) tseries: Time Series Analysis and Computational  
947 Finance.  
948  
949  
950



951 **Figures**

952

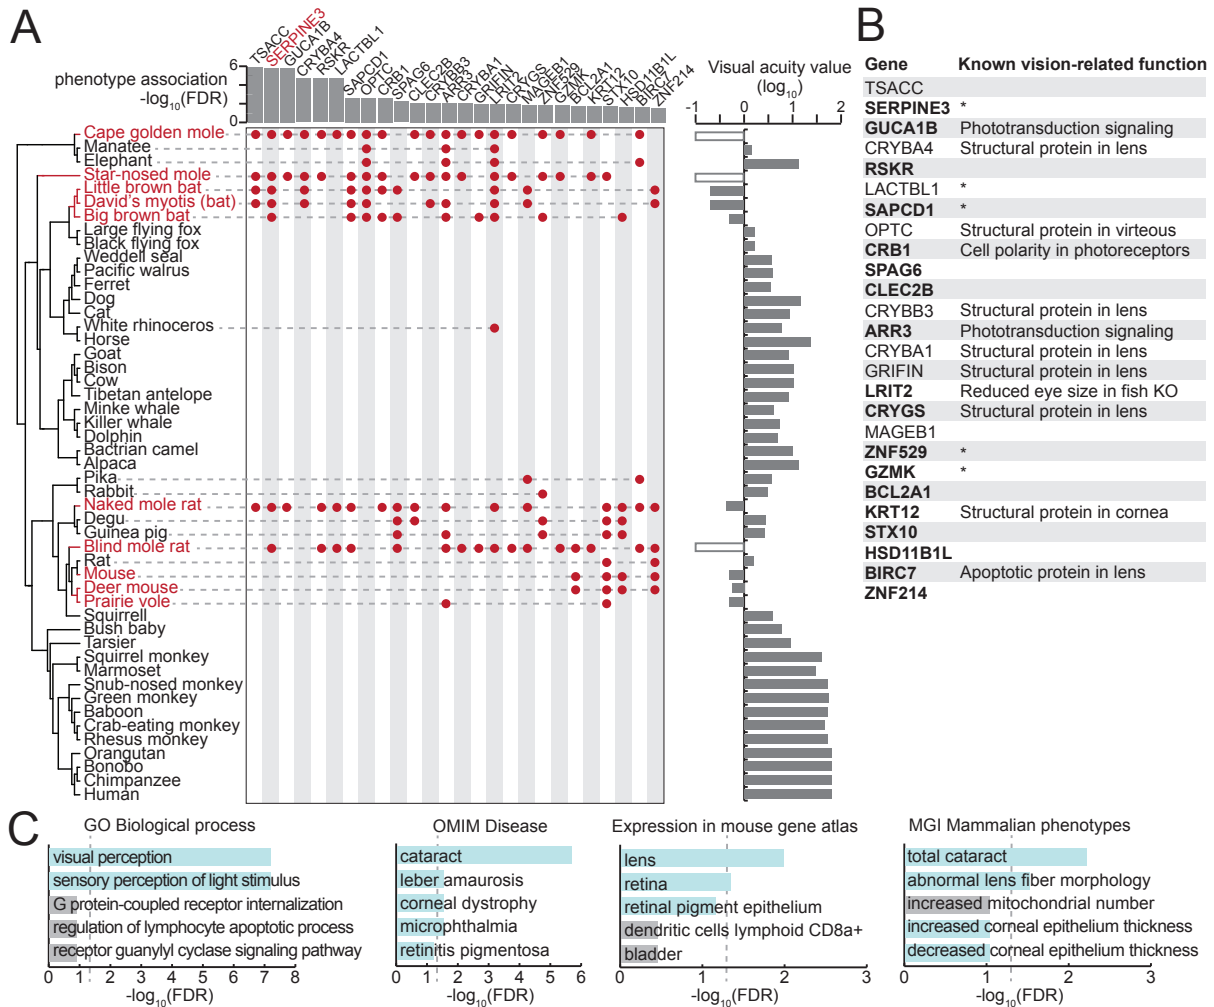

953

954

955

956

957

958

959

960

961

962

963

964

965

966

967

968

969

970

**Figure 1:** A comparative genomics screen uncovered known and novel vision-related genes. (A) Phylogeny of the species included in our screen (left). Visual acuity values on a  $\log_{10}$  scale are shown on the right as a bar chart; white boxes indicate the three subterranean mammals that lack acuity measurements but are functionally blind. Low-acuity species (red font) are defined here as species with visual acuity  $<1$  ( $\log_{10}(\text{va}) < 0$ , results for other thresholds are provided in Tab. S1). At a false discovery rate (FDR) threshold of 0.05, our screen retrieved 26 genes, which are preferentially lost in low-acuity species. Genes lost in individual species are denoted by red dots. The FDR value for the gene loss – phenotype association is shown at the top as a bar chart. (B) List of 26 genes, together with known vision-related functions. Asterisk marks genes that have no known vision-related function but were mentioned in large-scale gene expression data sets of ocular tissues. Genes in bold are expressed in human eyes according to the eyeIntegration database (98) (see Methods). KO - knockout. (C) Functional enrichments of the 26 genes reveals vision-related functions (Gene Ontology, GO of biological processes), associations with human eye disorders (OMIM), expression in ocular tissues in the mouse gene atlas (80) and eye phenotypes in mouse gene KOs (MGI Mammalian Phenotype level 4) among the top five most significant terms. Vision-related terms

971 are shown as blue bars. The dashed line indicates statistical significance in a one-sided  
972 Fisher's exact test after correcting for multiple testing using the Benjamini-Hochberg  
973 procedure (FDR 0.05).

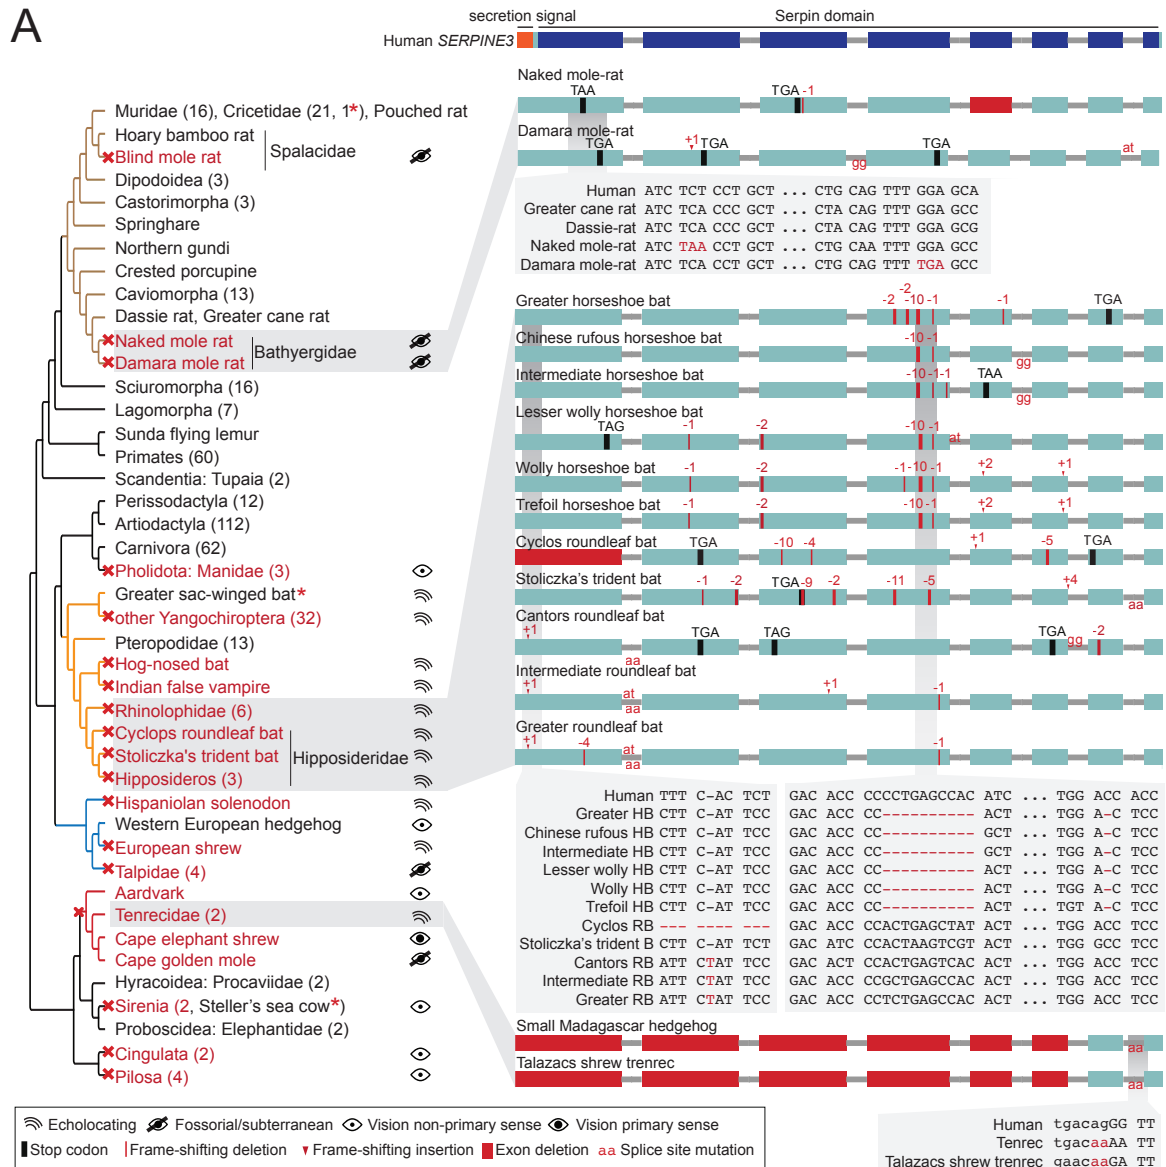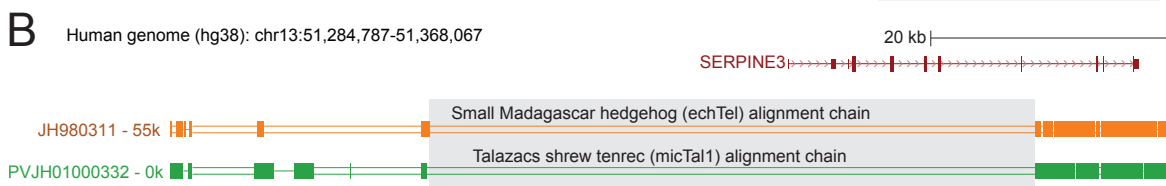

974

975

**Figure 2: *SERPINE3* gene loss pattern across 430 mammalian species.**

976

(A) Left: Phylogeny of mammalian species investigated for the loss of *SERPINE3* with mapped

977

gene loss events indicated as red crosses. Branches of major clades are colored (Rodentia –

978

brown, Chiroptera – orange, Eulipotyphla – blue, Afroinsectiphilia - red). The number of

979

species investigated per clade is specified in parenthesis. For all loss lineages (red font), visual

980

capability (classified as echolocating, fossorial/subterranean, vision as non-primary and

981

primary sense) is displayed as pictograms at the right. Asterisk marks indicate species, where

982

*SERPINE3* evolved under relaxed selection but did not accumulate inactivating mutations.

983

Right: The Serpin protein domain (Pfam) spans all eight protein-coding exons (boxes) of the

984

intact human *SERPINE3* gene (top). Gene-inactivating mutations are illustrated for three

985

clades, with stop codon mutations shown in black, frame-shifting insertions and deletions

986 shown in red and mutated splice site dinucleotides shown between exons in red. Deleted  
987 exons are shown as red boxes. Insets show codon alignments with inactivating mutations in  
988 red font. RB - roundleaf bat, HB - horseshoe bat. See Fig. S1-7 for detailed plots for all species  
989 with gene-inactivating mutations.

990 (B) UCSC genome browser (106) view of the human hg38 assembly showing the *SERPINE3*  
991 locus and the orthologous alignment chains of two tenrec species (blocks represent aligning  
992 sequence, double lines represent unaligning sequence). A deletion removed the first five  
993 protein-coding exons of *SERPINE3* in both species. Shared breakpoints (gray box) indicate  
994 that the deletion likely represents an ancestral event in Tenrecidae.

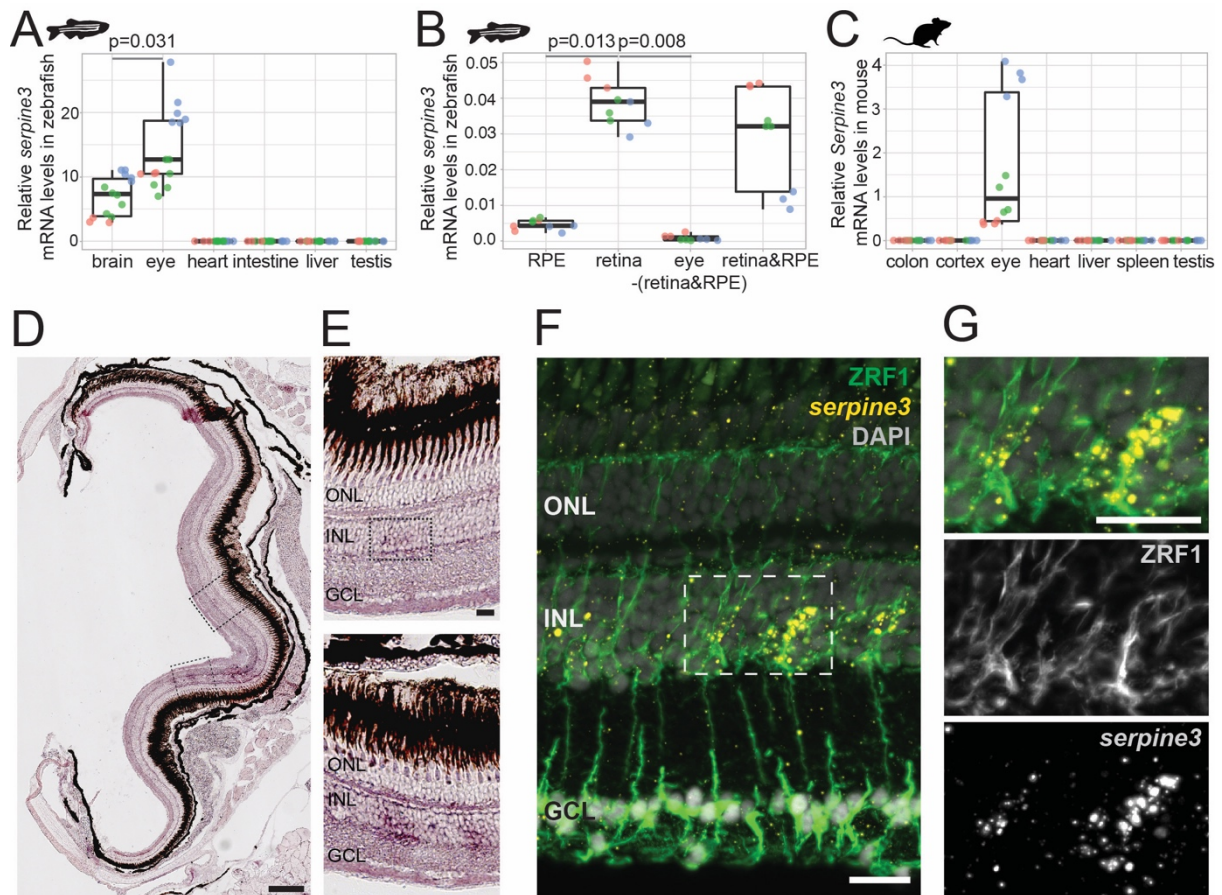

995

996

**Figure 3:** *Serpine3* is expressed in zebrafish and mouse eyes.

997

(A) Expression of zebrafish *serpine3* mRNA in relation to the reference gene *rpl13a* measured with RT-qPCR. *Serpine3* is expressed in brain and eye but not in heart, intestine, liver or testis of adult zebrafish. Expression was significantly higher in eye compared to brain (one-sided t-test).

1000

1001

(B) *Serpine3* mRNA expression in different tissues of the zebrafish eye in relation to the reference gene *actb* measured with RT-qPCR. *Serpine3* is specifically expressed in the retina but not in other tissues of the eye. The expression level is significantly higher in retina without RPE compared to RPE only (two-sided t-test).

1002

1003

1004

1005

(C) *Serpine3* mRNA expression in mouse in relation to the reference gene *Rpl27* measured with RT-qPCR. *Serpine3* is specifically expressed in the eye but not in colon, cortex, heart, liver, spleen and testis. Technical replicates are shown in the same color.

1006

1007

1008

(D-G) *Serpine3* mRNA expression pattern in zebrafish retina. Chromogenic *in situ* hybridization (ISH, D-E) shows localized expression of *serpine3* (purple) in the retina, specifically in the inner nuclear layer (inlet). (F-G) Fluorescence *in situ* hybridization shows that *serpine3* mRNA expression (yellow) is localized to cell bodies of Mueller glia cells. Filaments of Mueller glia cells are marked by the glial fibrillary acidic protein (ZRF1 antibody, green). Nuclei are stained with DAPI (white). Scale bar is 200  $\mu$ m in (D) and (F) and 20  $\mu$ m in (E) and (G). INL – inner nuclear layer, ONL – outer nuclear layer, GCL – ganglion cell layer.

1009

1010

1011

1012

1013

1014

1015



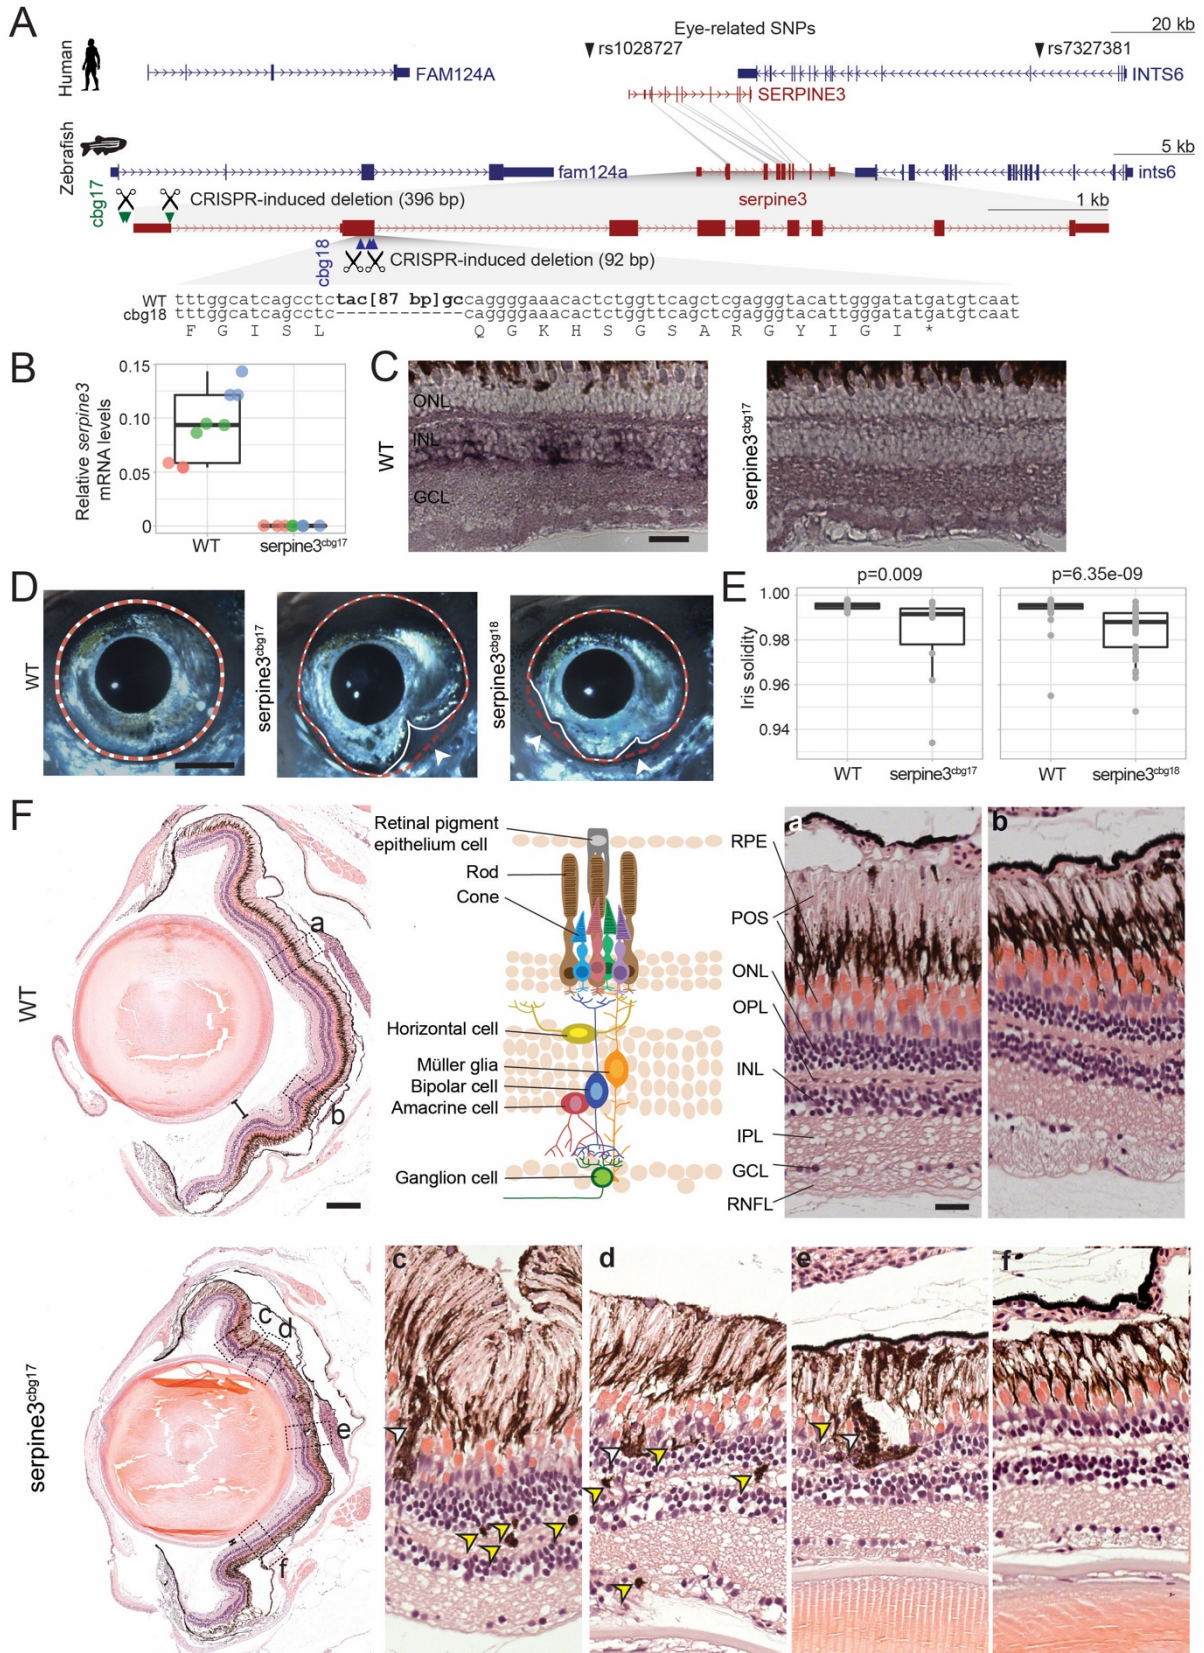

1016  
1017  
1018  
1019  
1020

**Figure 4:** *Serpine3* knockout in zebrafish causes defects in eye shape and retinal layering. (A) UCSC genome browser visualization of the *SERPINE3* genomic locus in human (hg38 assembly, top) and zebrafish (danRer11 assembly, bottom) shows that both species have a 1:1 ortholog with the same number of coding exons in a conserved gene order context. In the



1021 human locus, two single nucleotide polymorphisms (SNPs) are in linkage with *SERPINE3* and  
1022 associated with eye phenotypes. In zebrafish, we used CRISPR-Cas9 to generate two  
1023 independent knockout (KO) lines. The position of guide RNAs is indicated as scissors. In the  
1024 *serpine3<sup>cbg17</sup>* line, we deleted the promoter and first exon. In the *serpine3<sup>cbg18</sup>* line, we  
1025 introduced a 92 bp frame-shifting deletion in exon 2 (coding exon 1) that results in three early  
1026 stop codons in the original reading frame.

1027 (B) Relative expression of *serpine3* mRNA in wild type (WT) zebrafish and *serpine3<sup>cbg17</sup>*  
1028 individuals (n=3 each) quantified by RT-qPCR relative to the expression of *rpl28*. *Serpine3<sup>cbg17</sup>*  
1029 fish do not express *serpine3* mRNA. Technical replicates are shown as individual data points,  
1030 the same color encoding one biological replicate.

1031 (C) *In situ* hybridization showing that *serpine3* is expressed in the inner nuclear layer (INL) of  
1032 WT zebrafish but not in the homozygous *serpine3<sup>cbg17</sup>*. Scale bar = 25  $\mu$ m.

1033 (D) *Serpine3* knockout leads to changes in eye shape in adult, homozygous knockout (KO)  
1034 fish of *serpine3<sup>cbg17</sup>* and *serpine3<sup>cbg18</sup>* lines in comparison to their WT siblings (18 and 11  
1035 months, respectively). In WT, the eye shape almost perfectly corresponds to the concave  
1036 shape of the iris (overlay of white and red dotted lines). In contrast, many KO individuals have  
1037 alterations in eye shape, evident by notches in white line that follows the iris. Scale bar = 1  
1038 mm.

1039 (E) Iris solidity (ratio of eye shape/ concave eye shape) significantly differs between WT and  
1040 KO siblings for both the *serpine3<sup>cbg17</sup>* (16 vs. 10 eyes) and the *serpine3<sup>cbg18</sup>* (40 vs. 40 eyes)  
1041 line. A Wilcoxon Rank sum test was used.

1042 (F) Hematoxylin/eosin histology staining of the eye of *serpine3<sup>cbg17</sup>* fish (22 months) reveals  
1043 histological differences in comparison to their WT siblings (dorsal top, ventral bottom). In  
1044 comparison to WT, distance between lens and retina of *serpine3<sup>cbg17</sup>* fish is reduced (distance  
1045 bars). The WT retina (top) has a distinct lamination with clear separation of the single retinal  
1046 layers (a, b) as shown in the schematic (RPE – retinal pigment epithelium layer, POS –  
1047 photoreceptor outer segment, ONL – outer nuclear layer, OPL – outer plexiform layer, INL –  
1048 inner nuclear layer, IPL – inner plexiform layer, GCL – ganglion cell layer, RNFL – retinal nerve  
1049 fiber layer). Although all retinal layers are present in *serpine3<sup>cbg17</sup>* fish, the layering appears  
1050 distorted and the density of cells is reduced (c-f). Specifically, the RPE cells display an altered  
1051 distribution and even local clusters (empty arrows), and displaced pigmented cells emerge in  
1052 all retinal layers (yellow arrows). Scale bar in the overviews = 200  $\mu$ m, scale bar in the  
1053 magnifications = 20  $\mu$ m.

## Supplementary Information for

# Vision-related convergent gene losses reveal *SERPINE3*'s unknown role in the eye

Henrike Indrischek<sup>1,2,3,4,5,6</sup>, Juliane Hammer<sup>7</sup>, Anja Machate<sup>7</sup>, Nikolai Hecker<sup>1,2,3,#</sup>,  
Bogdan M. Kirilenko<sup>1,2,3,4,5,6</sup>, Juliana G. Roscito<sup>1,2,3§</sup>, Stefan Hans<sup>7</sup>, Caren Norden<sup>1§</sup>,  
Michael Brand<sup>7\*</sup>, Michael Hiller<sup>1,2,3,4,5,6\*</sup>

<sup>1</sup> Max Planck Institute of Molecular Cell Biology and Genetics, Pfotenhauerstr. 108, 01307 Dresden, Germany

<sup>2</sup> Max Planck Institute for the Physics of Complex Systems, Nöthnitzer Str. 38, 01187 Dresden, Germany

<sup>3</sup> Center for Systems Biology Dresden, Pfotenhauerstr. 108, 01307 Dresden, Germany

<sup>4</sup> LOEWE Centre for Translational Biodiversity Genomics, Senckenberganlage 25, 60325 Frankfurt, Germany

<sup>5</sup> Senckenberg Research Institute, Senckenberganlage 25, 60325 Frankfurt, Germany

<sup>6</sup> Faculty of Biosciences, Goethe-University, Max-von-Laue-Str. 9, 60438 Frankfurt, Germany

<sup>7</sup> Center for Regenerative Therapies Dresden (CRTD), TU Dresden, Fetscherstraße 105, 01307 Dresden, Germany

# current affiliation: Center for Brain & Disease Research, VIB-KU Leuven, Herestraat 49, 3000 Leuven, Belgium; Department of Human Genetics, KU Leuven, Herestraat 49, 3000 Leuven, Belgium

§ current affiliation: DRESDEN-concept Genome Center, DFG NGS Competence Center, c/o Center for Molecular and Cellular Bioengineering (CMCB), TU Dresden, 01307 Dresden, Germany

\$ current affiliation: Instituto Gulbenkian de Ciência, Rua da Quinta Grande 6, 2780-156 Oeiras, Portugal

\*To whom correspondence should be addressed:

Michael Brand <[michael.brand@tu-dresden.de](mailto:michael.brand@tu-dresden.de)> & Michael Hiller  
<[michael.hiller@senckenberg.de](mailto:michael.hiller@senckenberg.de)>

**This PDF file includes:**

Supplementary Information text

Figures S1 to S16

Supplementary References

**Other supplementary materials for this manuscript include the following:**

Supplementary Tables S1-S9 included as sheets in an Excel file.

## Supplementary Information Text

### **Mammalian SERPINE3 have features of inhibitory, secreted SERPINS.**

Mammalian SERPINE3 carry an N-terminal signal peptide (Fig. S8) that is predicted to lead to their secretion into the extracellular space in 96% of all analyzed intact and complete SERPINE3. SignalP 5.0 did not predict the presence of a signal peptide for four species: fat dormouse, black flying fox and puma.

Sequence analysis of intact and complete SERPINE3s revealed that two key features of inhibitory serpins are well conserved among placental mammals. First, the substrate determining residues P4-P4' are conserved (positions 366-372 in human SERPINE3), whereby P1 denotes the substrate binding scissile bond, position 369 (Fig. S9) (1). This position is occupied by an arginine in SERPINE3 as is the case in the inhibitory SERPINE1 and SERPINE2 proteins. Second, the close-by hinge region (positions 355-361) is mostly occupied by small amino acids without prolines. This may allow the insertion of the hinge region into the A beta sheet, a key feature of serpins' inhibitory mechanism (2).

Furthermore, AlphaFold2 (3) predicted a three-dimensional structure of the human SERPINE3 that is very similar to other native serpins (mean RMSD to native structures 1.6 Å, Tab. S9) and adopts the native fold of serpins with an exposed, disordered reactive core loop for substrate binding that does not seem to adopt an alpha-helical conformation as in the non-inhibitory ovalbumin (4). Taken together, this suggests that SERPINE3 functions as a secreted serine protease inhibitor.



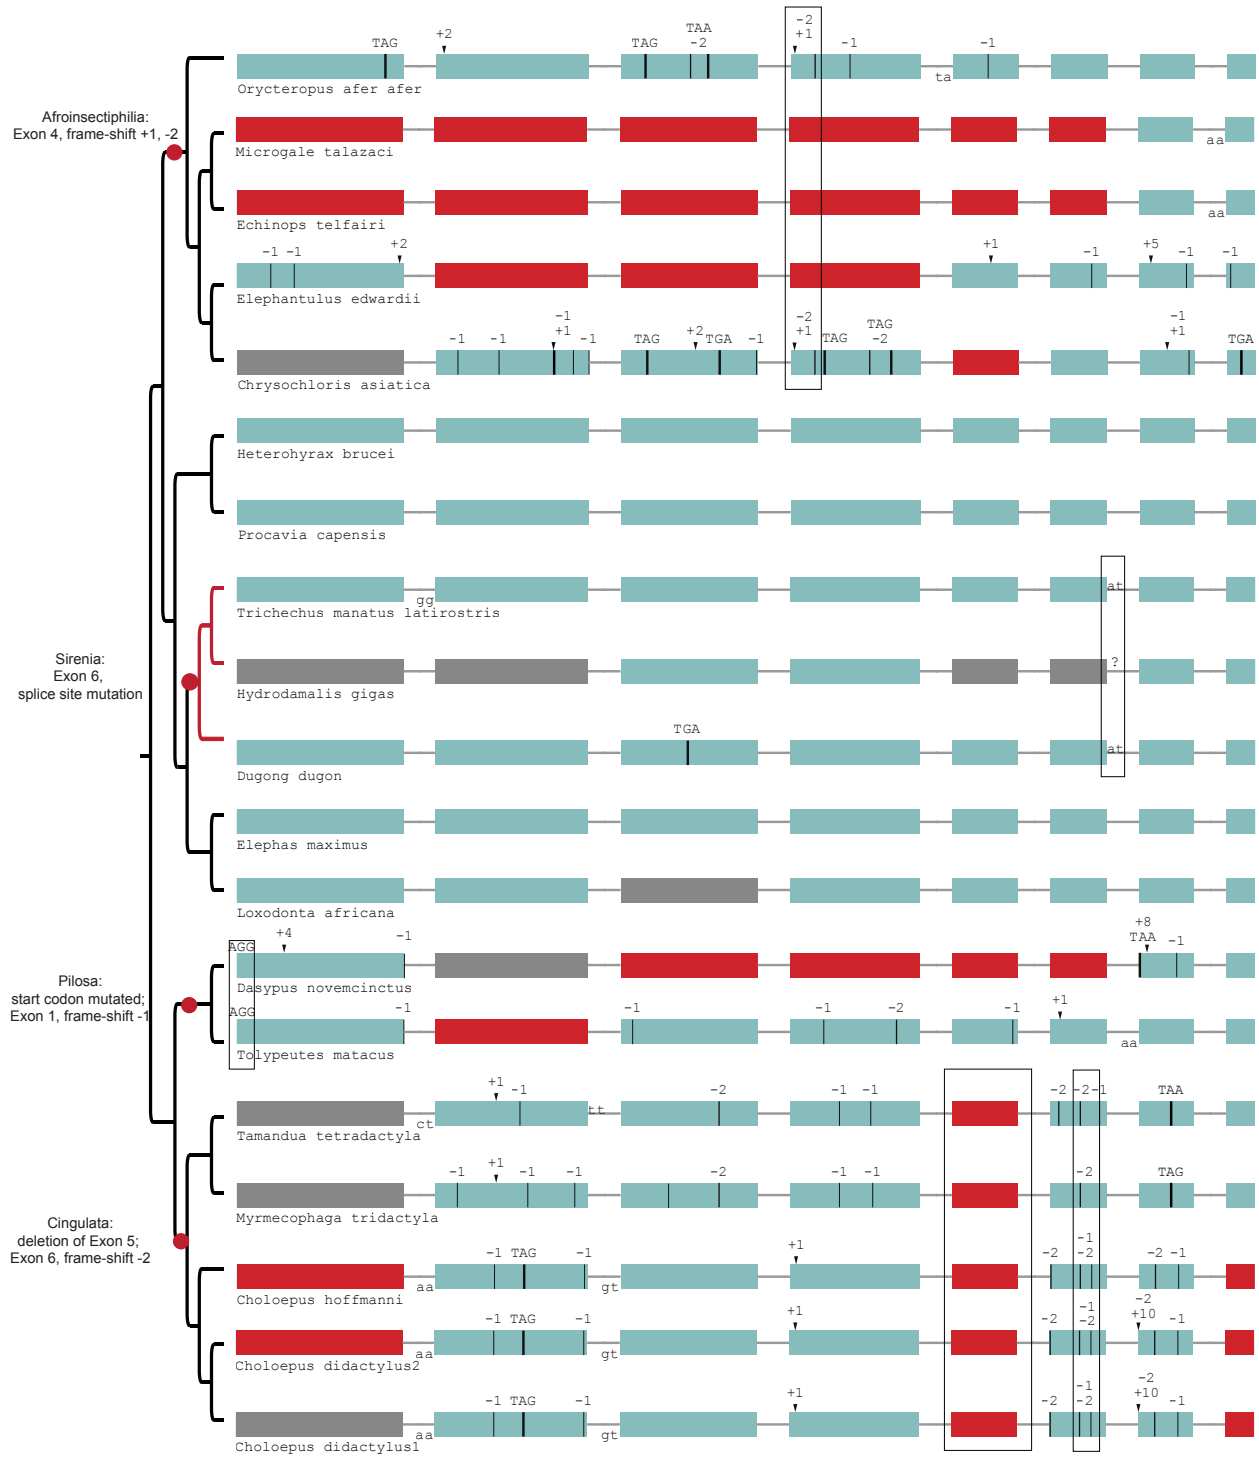

**Fig. S1.** Gene-inactivating mutations support four independent losses of *SERPINE3* in Afrotheria and Xenarthra (red dots).

Those shared mutations are marked by boxes, which indicate the loss of *SERPINE3* in the common ancestor of related species according to parsimony. For tenrecs (*Microgale talazaci*, *Echinops telfairi*) and elephant shrew (*Elephantulus edwardii*), the putative region of exon 4 was

likely deleted after the shared frame-shifting mutations. *SERPINE3* in Sirenia (branches marked in red) evolve under relaxed selection. Coloring and legend as in Fig. 2 in the main text. Gray exons denote missing information.

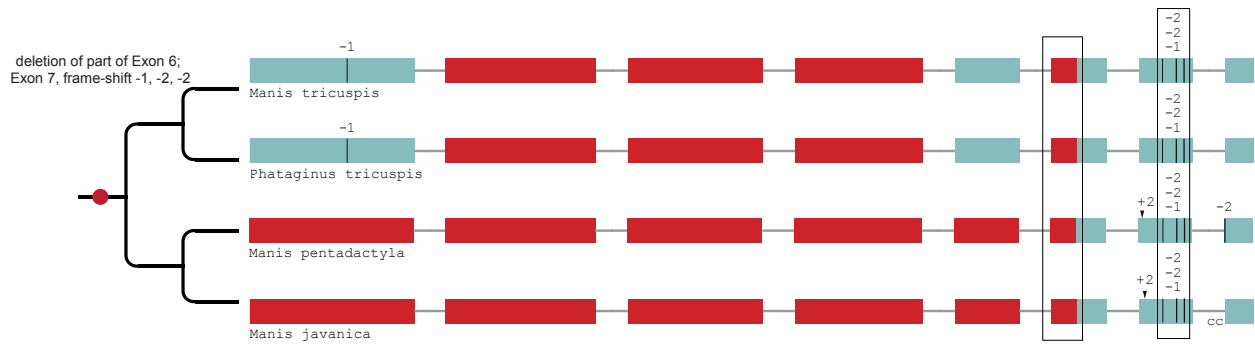

**Fig. S2.** Gene-inactivating mutations support a single loss of *SERPINE3* in Pholidota. A partial deletion of coding exon 6 and three frame-shifting deletions in exon 7 are shared among all four species, indicating a single loss of *SERPINE3* in the Pholidota lineage. Coloring and legend as in Fig. 2 in the main text.

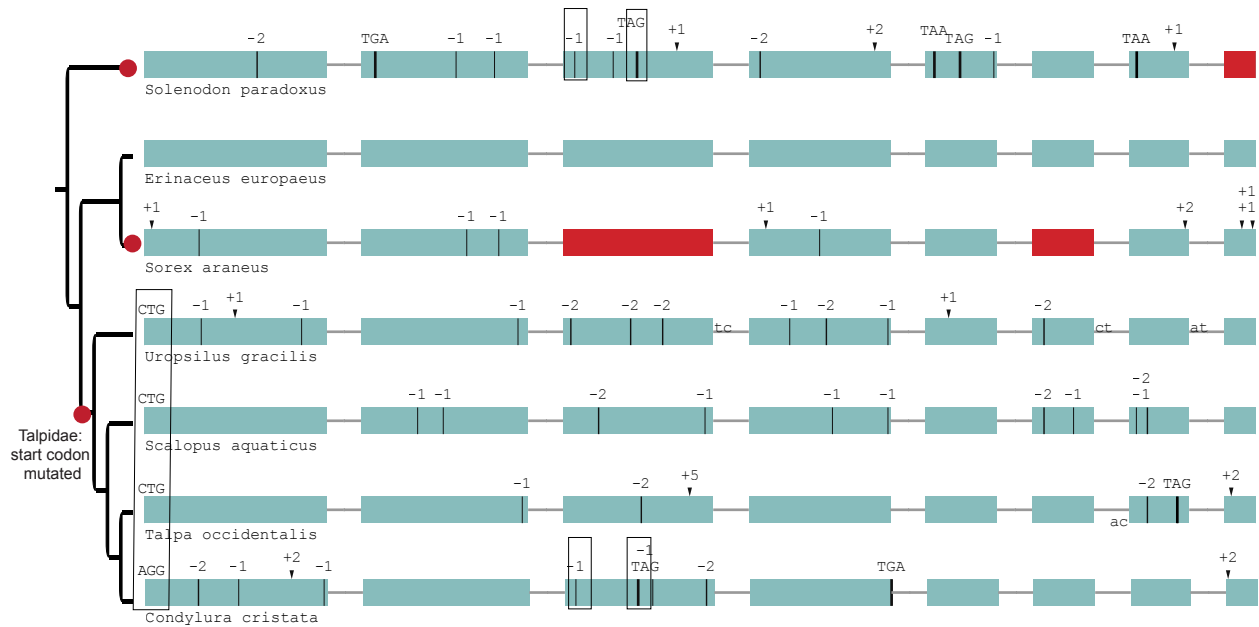

**Fig. S3.** Gene-inactivating mutations support three independent losses of *SERPINE3* in Eulipotyphla (red dots). The start codon is not intact in the four moles (a). Star-nosed mole (*Condylura cristata*) and Hispaniolan solenodon (*Solenodon paradoxus*) share two inactivating mutations in exon 3, although they are phylogenetically distant (b, c). Coloring and legend as in Fig. 2 in the main text.



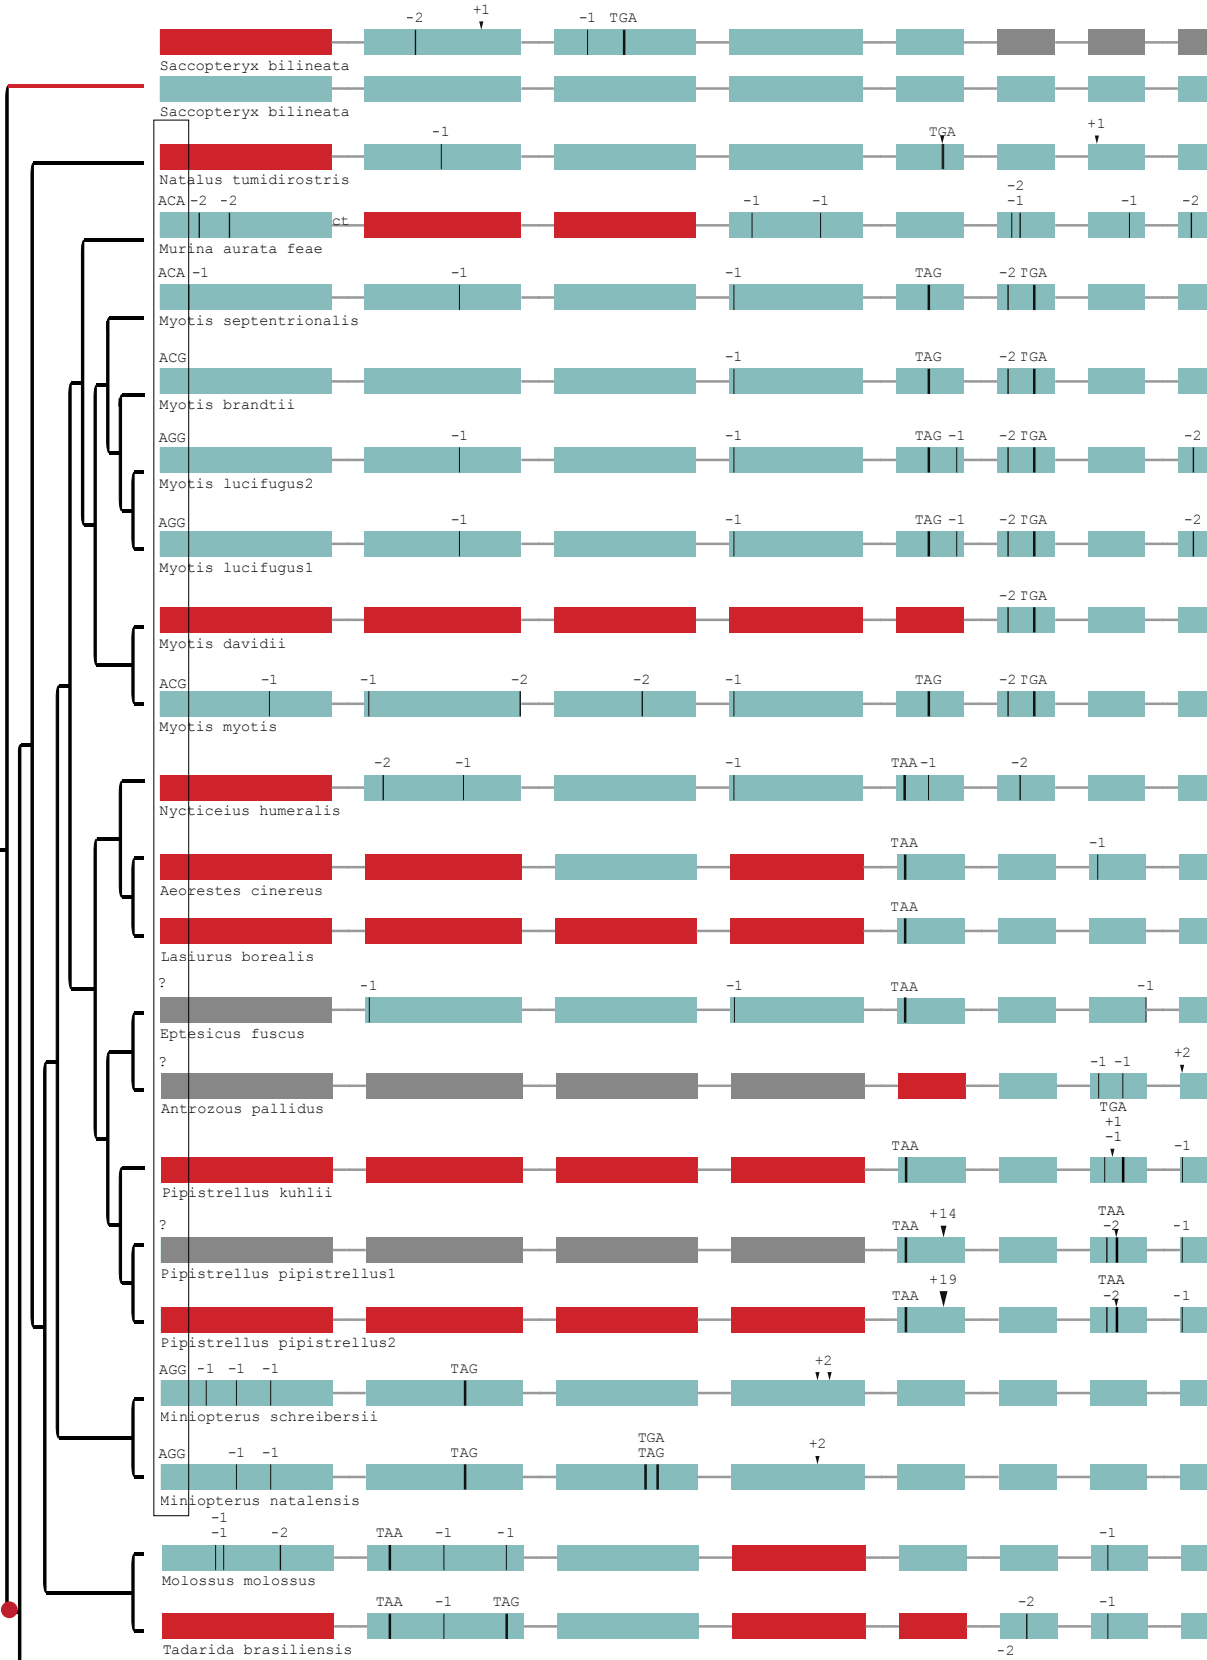

please see details on 15 more Yangochiroptera assemblies in Fig. S5

**Fig. S4.** Gene-inactivating mutations support one loss of *SERPINE3* in Yangochiroptera. The ancestral start codon is mutated in most Yangochiroptera (box). The most parsimonious explanation is a shared start codon mutation (red dot) in the ancestral lineage after split from the sac-winged bat (*Saccopteryx bilineata*). A back mutation to the regular start codon ATG likely occurred in *Molossus molossus* and *Artibeus jamaicensis*. Please see Fig. S5 for gene-inactivating mutations of 15 more Yangochiroptera assemblies. Sac-winged bat has an intact copy of the gene that evolves under relaxed selection (red branch) in addition to a second copy of *SERPINE3*, which was independently inactivated. Coloring and legend as in Fig. 2 in the main text. Gray exons denote missing information.

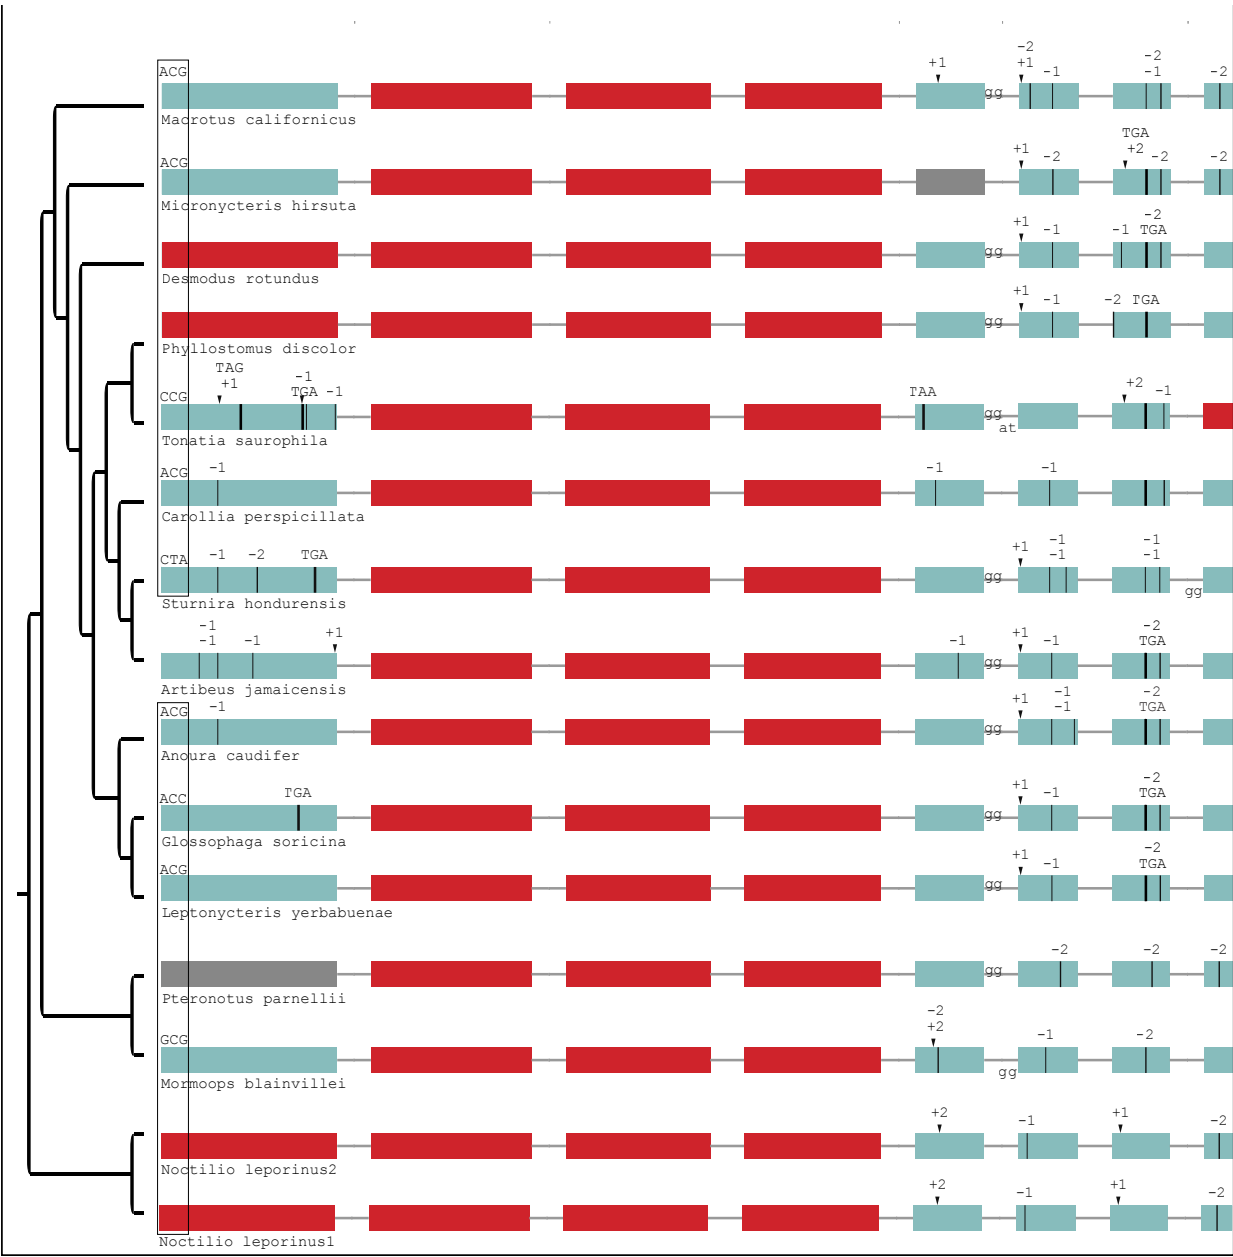

**Fig. S5.** Gene-inactivating mutations in more Yangochiroptera.

This is an extension to Fig. S4. The start codon mutation shown is shared with most other Yangochiroptera (Fig. S4). Coloring and legend as in Fig. 2 in the main text. Gray exons denote missing information.

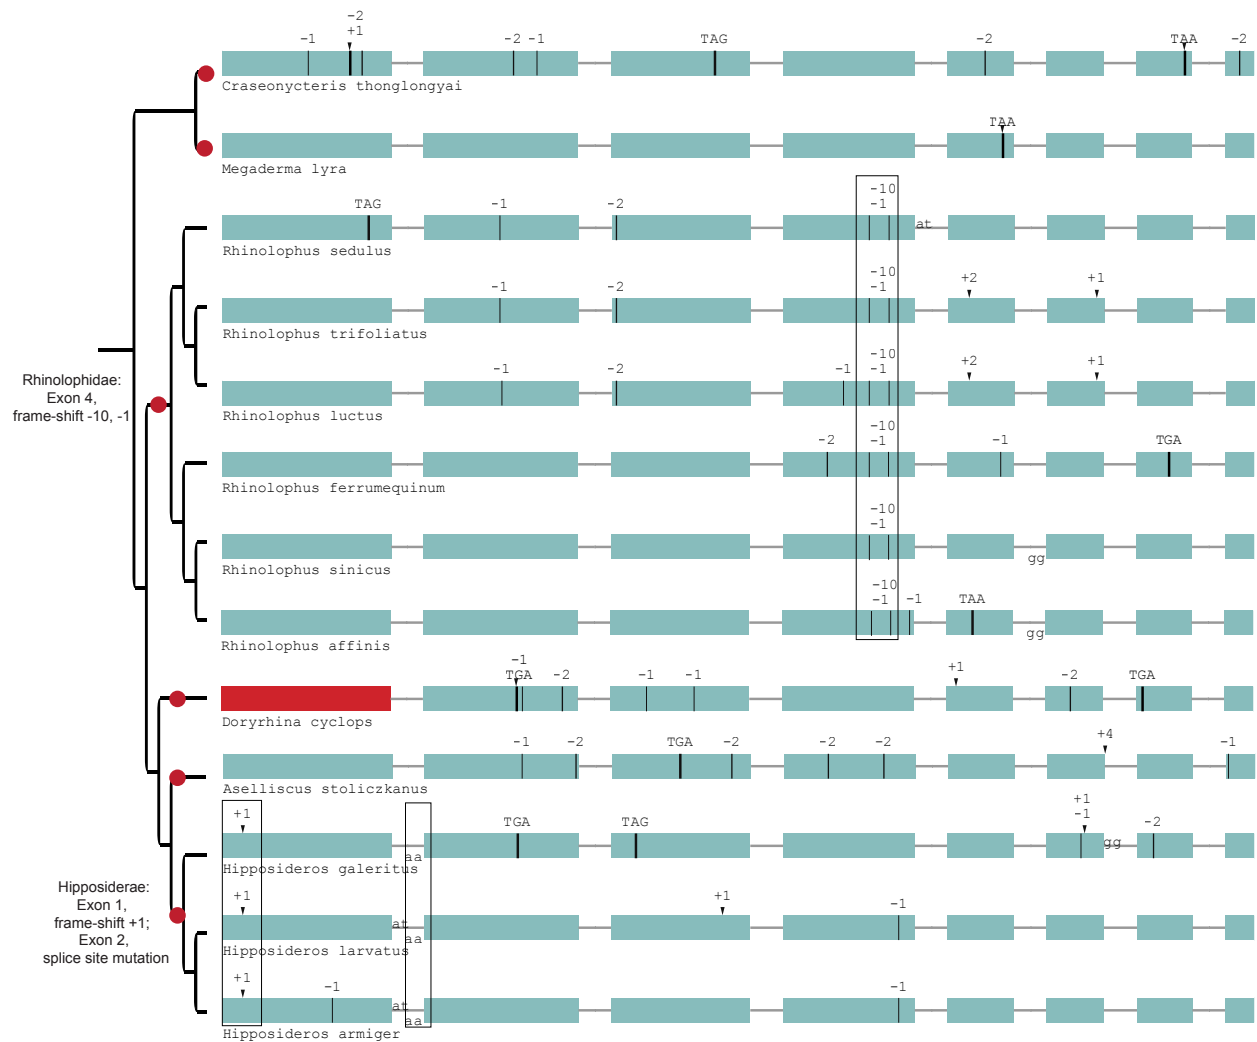

**Fig. S6.** Gene-inactivating mutations support six independent losses of *SERPINE3* in Yingochoiptera.

Six independent inactivation events (red dots) occurred in *SERPINE3*'s coding sequence in Yingochoiptera. All Rhinolophidae share frame-shifting mutations in exon 4 (boxed), while Hipposideros share a frame-shifting insertion in exon 1 and a splice site mutation at exon 2 (boxed). Coloring and legend as in Fig. 2 in the main text.



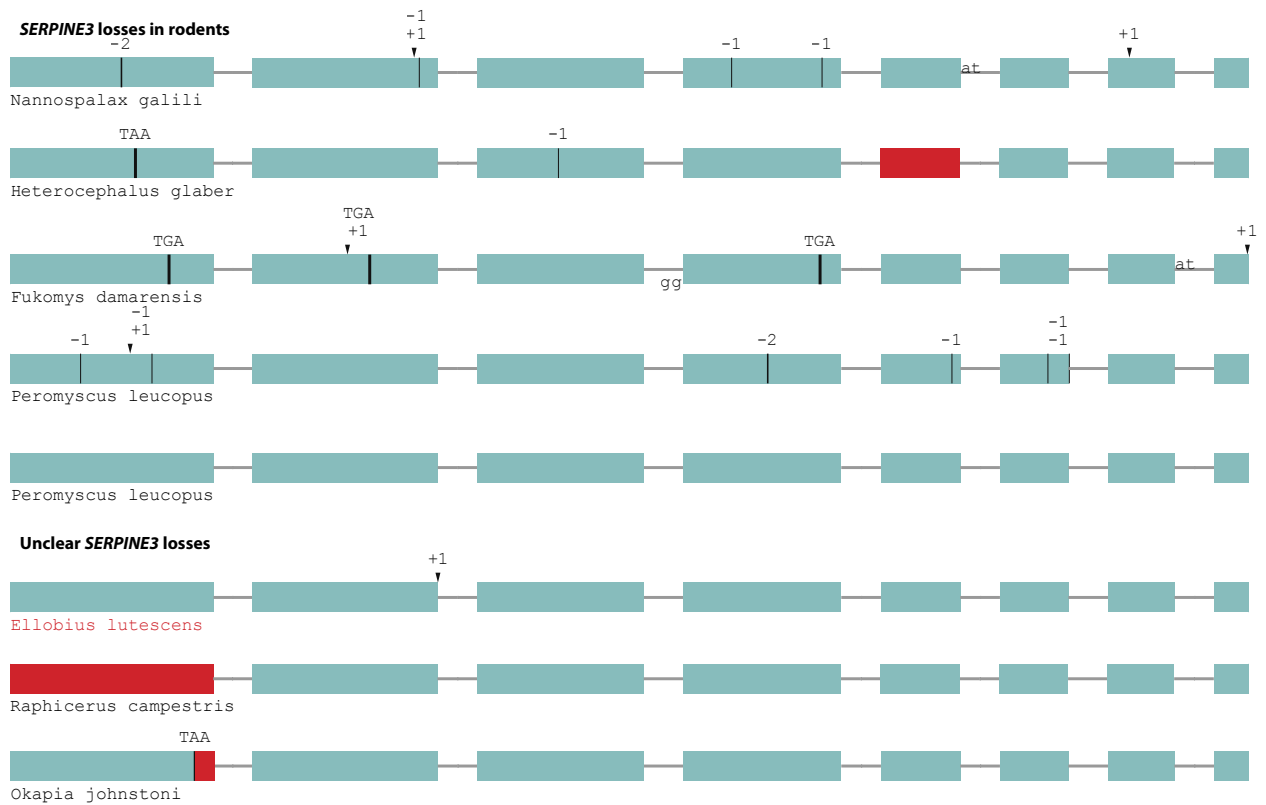

**Fig. S7.** Independent gene-inactivating mutations in other mammals.

A test for shifts in selective pressure revealed that *SERPINE3* evolves under relaxed selection in the subterranean mole vole (*Ellobius lutescens*, marked in red), but not in the other cases of gene-inactivating mutations with unclear consequences (steenbok, okapi). A species-specific duplication with inactivation of one *SERPINE3* copy occurred in white-footed mouse (*Peromyscus leucopus*). Coloring and legend as in Fig. 2 in the main text.

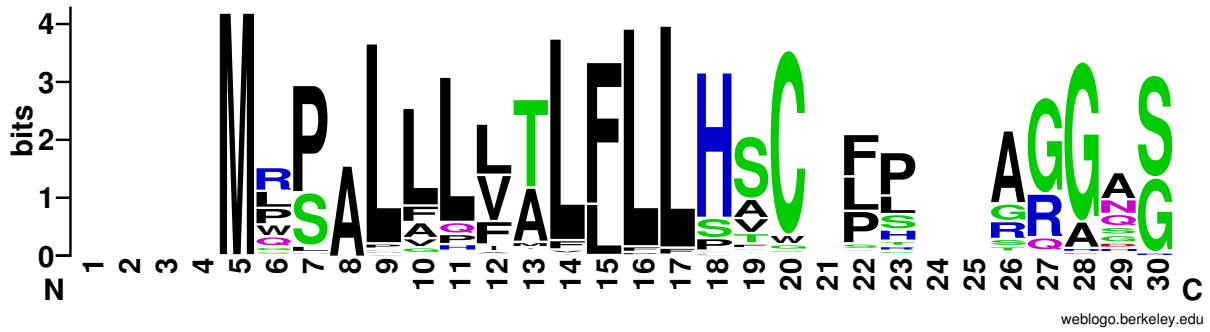

**Fig. S8.** Conservation of the signal peptide in mammalian SERPINE3.

The putative N-terminal signal peptide contains many hydrophobic residues in intact mammalian SERPINE3 and is predicted to guide secretion into extracellular space. We show the first 30 alignment columns. The sequence logo was generated with Weblogo (5).

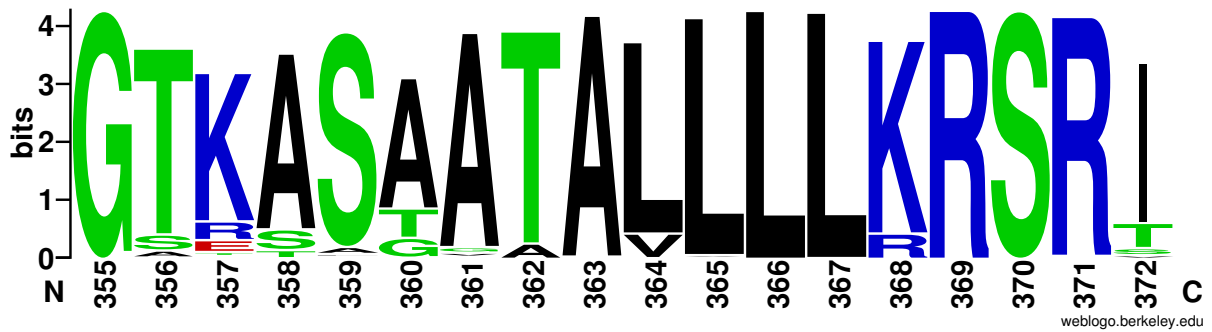

**Fig. S9.** The hinge region and reactive core loop are conserved in intact mammalian SERPINE3. The numbering is in reference to human SERPINE3, where R369 likely is the scissile bond (P1) within the reactive core loop (positions 366-372, P4-P4'). The hinge region is located at positions 355-361. The logo was generated with Weblogo (5).

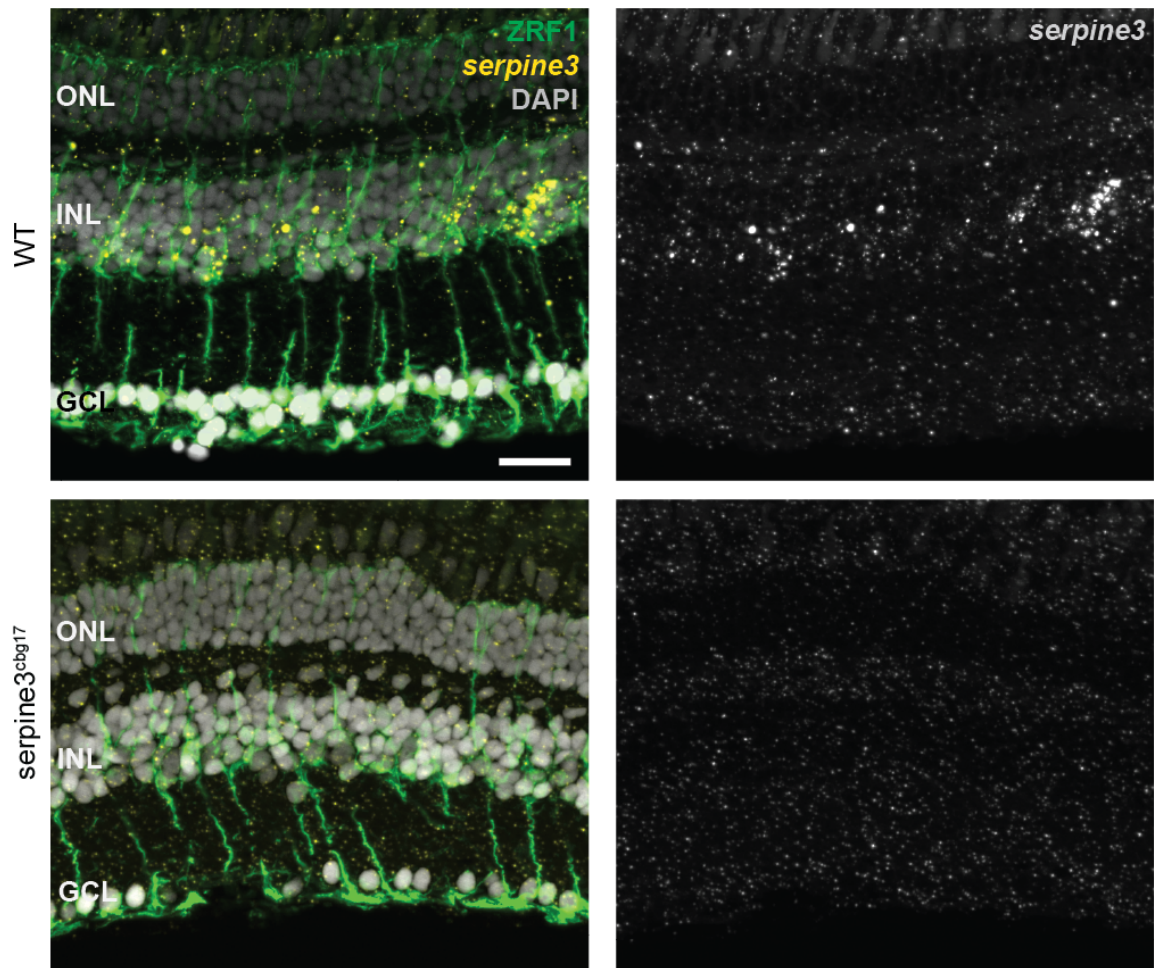

**Fig. S10.** *Serpine3* expression co-localizes with glial fibrillary acidic protein in the retina of wild type fish.

The fluorescence *in situ* signal for zebrafish *serpine3* is specific for wild type (WT, yellow), where it is in proximity to staining of the ZRF1-antibody (green). This indicates expression of *serpine3* by Mueller glia cells. *Serpine3* signal is not present in homozygous *serpine3*<sup>cbg17</sup> siblings. In the overlay, nuclei (DAPI) are shown in white. ONL – outer nuclear layer, INL – inner nuclear layer, GCL – ganglion cell layer.

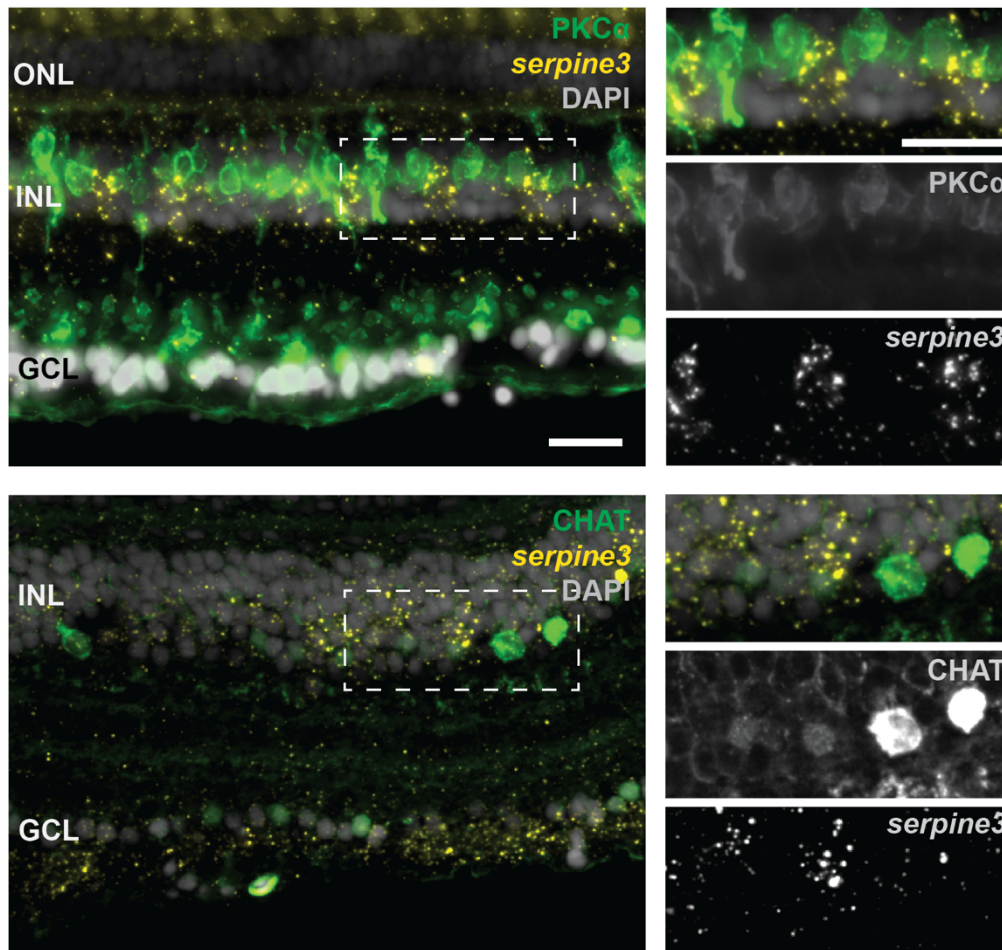

**Fig. S11.** *Serpine3* expression does not co-localize with markers for bipolar or amacrine cells in the zebrafish retina.

Fluorescence *in situ* hybridization of *serpine3* mRNA (yellow) does not show co-localization with anti-protein kinase C alpha (PKCα encoded by *prkca*, green) or choline O-acetyltransferase a (CHAT, encoded by *chata*, green) proteins. In the overlay, nuclei (DAPI) are shown in white. ONL – outer nuclear layer, INL – inner nuclear layer, GCL – ganglion cell layer. Scale bar overview = 20 μm, details = 20 μm.

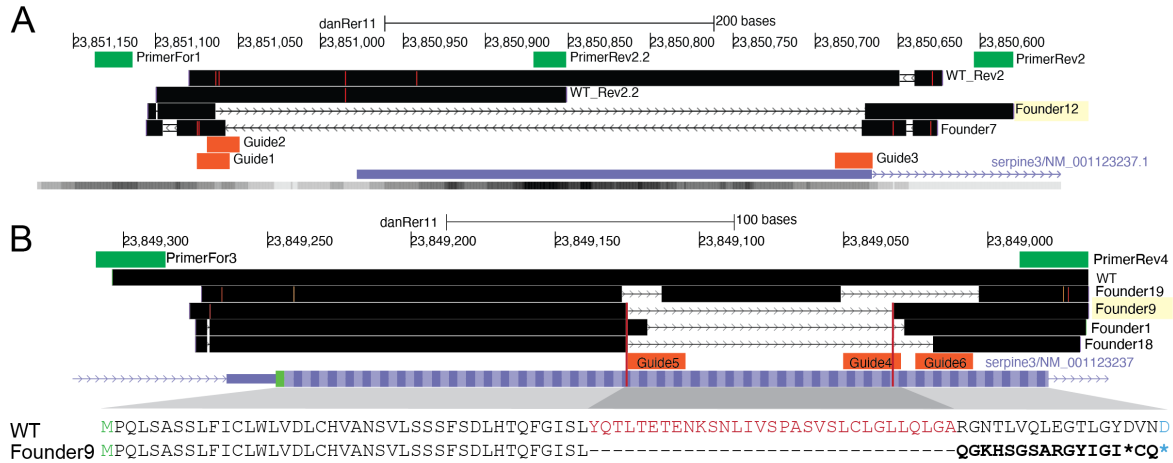

**Fig. S12.** Knockout of *serpine3*<sup>cbg17</sup> and *serpine3*<sup>cbg18</sup> alleles in zebrafish by CRISPR-Cas9 is confirmed by sequencing results.

Sequenced reads are mapped against the danRer11 zebrafish genome assembly with Blat and are visualized in the UCSC genome browser (black) together with the *serpine3* RefSeq annotation (blue).

(A) PCRs with primers For1 and Rev2 or For1 and Rev2.2 (green) amplify the expected regions around the transcription start site on chromosome 9 in wild type (WT\_Rev2, WT\_Rev2.2). Injection of CRISPR guides 1, 2 and 3 (orange) results in a deletion of about 400 bp for founder individuals 7 and 12 in *serpine3*<sup>cbg17</sup>. Offspring of founder 12 (394 bp deletion) was raised and further crossed. The location of a single *serpine3* transcription start site is supported by annotation and activating histone marks H3K4me3 within the respective region (lower gray bar with darkness of Color correlating with signal intensity).

(B) PCR with primers For3 and Rev4 (green) amplifies a region around coding exon1 of *serpine3*. Injection of CRISPR guides 4, 5 and 6 (orange) results in a deletion of about 100 bp for founders 1, 9, 18 and 19 in *serpine3*<sup>cbg18</sup>. For founder 9, this 92 bp deletion induces a frame-shift in the reading frame (bold) with three early stop codons (two shown as \*, third stop located in coding exon 2). The deletion is equivalent to deletion of 31 amino acids (red) and +1 nt insertion. The amino acid encoded by a split codon is shown in blue.



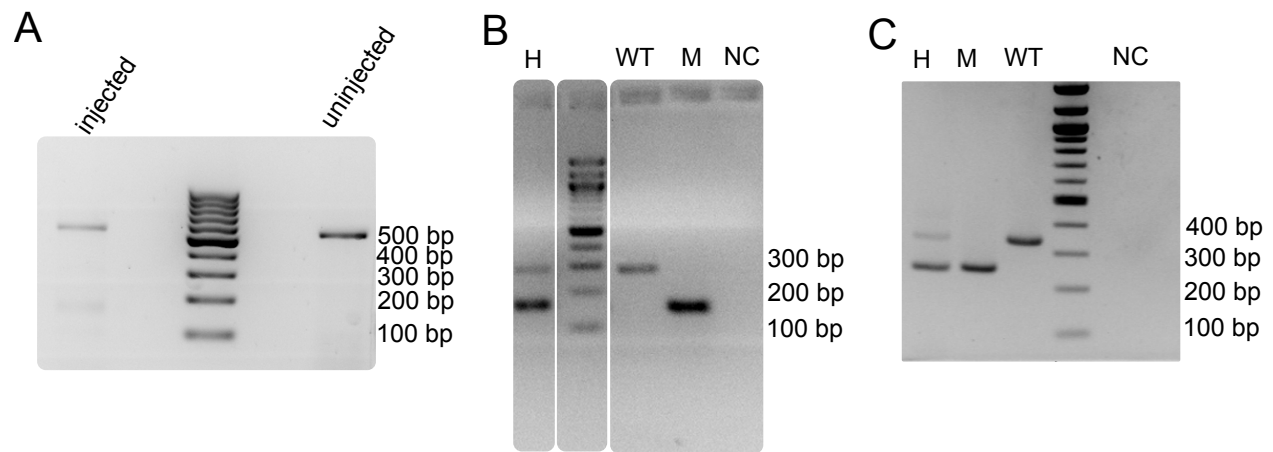

**Fig. S13.** PCRs confirm expected CRISPR-Cas9 induced deletions in *serpine3*<sup>cbg17</sup> and *serpine3*<sup>cbg18</sup> fish.

(A) Genotyping of the *serpine3*<sup>cbg17</sup> with two primers (F0 generation). Injection of CRISPR guides into the one-cell embryo leads to mosaic embryos (several pooled at 72 hpf) with a strong wild type (WT) band at about 557 bp and a weak mutant band at about 161 bp, while uninjected embryos just have a single WT band (557 bp).

(B) Genotyping of *serpine3*<sup>cbg17</sup> with a mix of three primers (F2 generation). Heterozygous animals (H) have two bands, a WT (expected height: 286 bp) and mutant band (expected height: 161 bp), while homozygous mutants (M) and homozygous WT animals show a single band.

(C) Genotyping of *serpine3*<sup>cbg18</sup> with two primers. Heterozygous animals (H) have two bands, a WT (expected height: 342 bp) and mutant band (expected height: 250 bp), while homozygous mutants (M) and homozygous WT animals show a single band. NC – negative control (water).

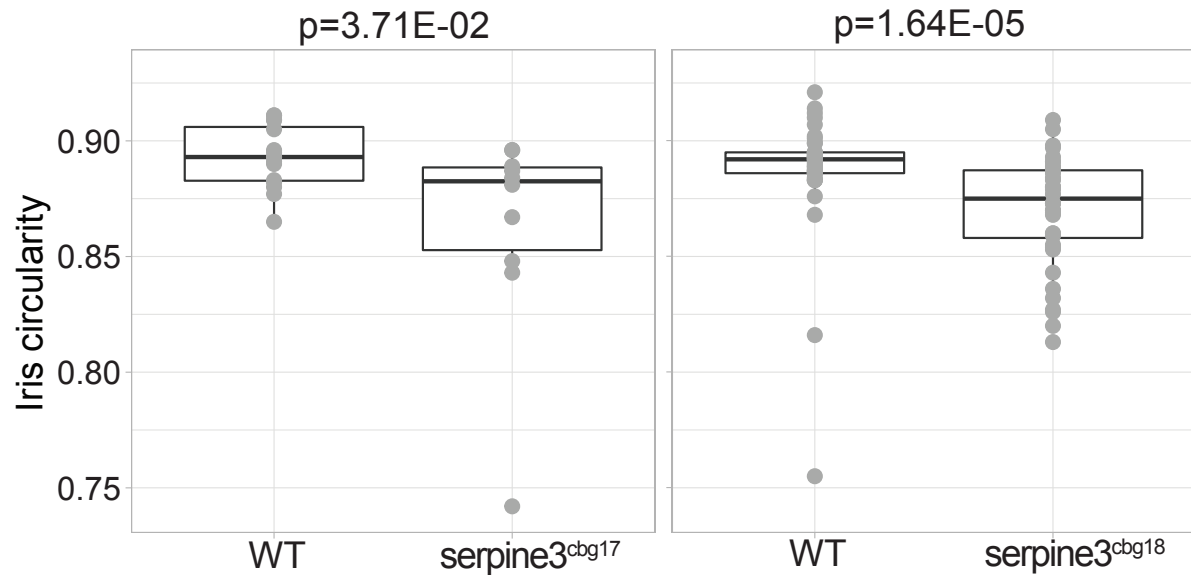

**Fig. S14.** Iris circularity differs between *serpine3*<sup>cbg17</sup> and *serpine3*<sup>cbg18</sup> fish and their respective wild type siblings (WT).

Iris circularity is another descriptor for the deviation of eye shape and is defined as  $4\pi \times [\text{Area}]/[\text{Perimeter}]^2$ . A value of 1 indicates a perfect circle. Box plots show that iris circularity significantly differs between WT (n=14) and *serpine3*<sup>cbg17</sup> eyes (n=10). The same holds for the comparison of WT (n=40) and *serpine3*<sup>cbg18</sup> eyes (n=40). A Wilcoxon Rank sum test was used.

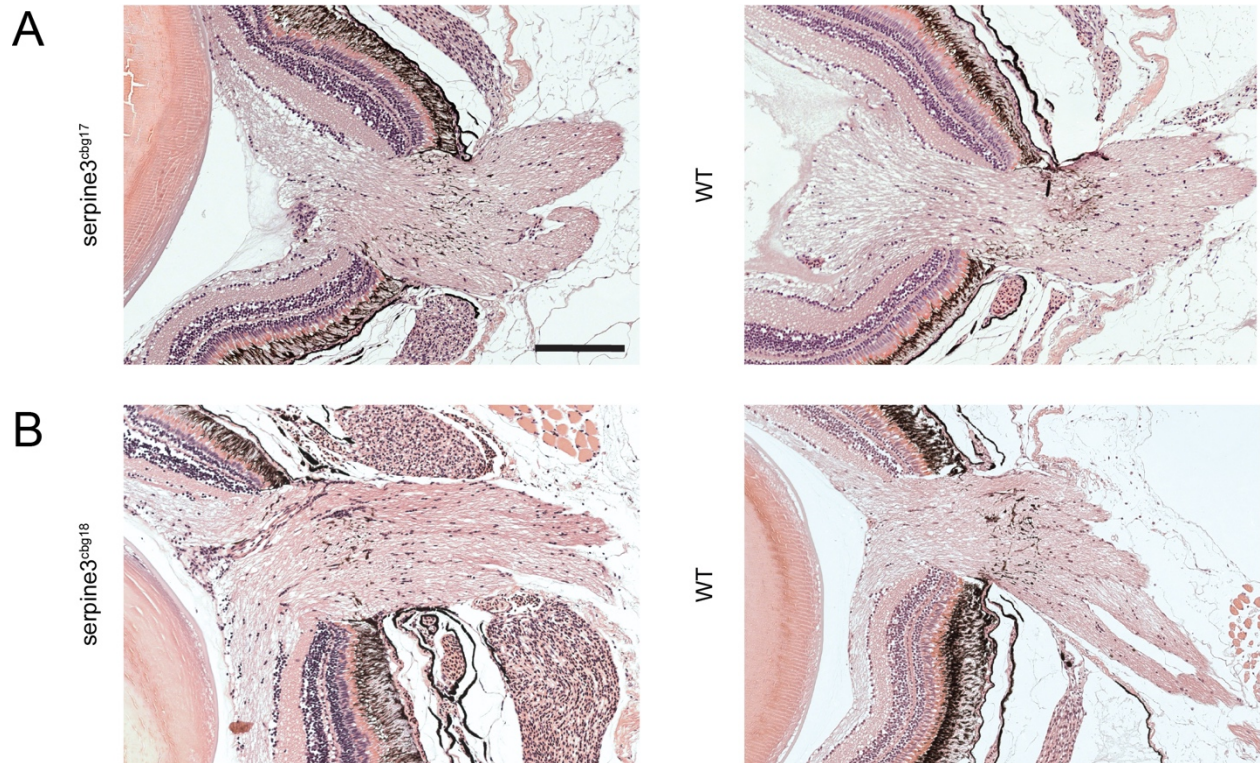

**Fig. S15.** The optic nerve is intact in *serpine3<sup>cbg17</sup>* and *serpine3<sup>cbg18</sup>* fish as shown in a hematoxylin/eosin histology staining.

No difference in optic nerve morphology is observed between *serpine3<sup>cbg17</sup>* (A) and *serpine3<sup>cbg18</sup>* fish (B) and their respective wild type (WT) siblings. Scale bar = 200  $\mu$ m.

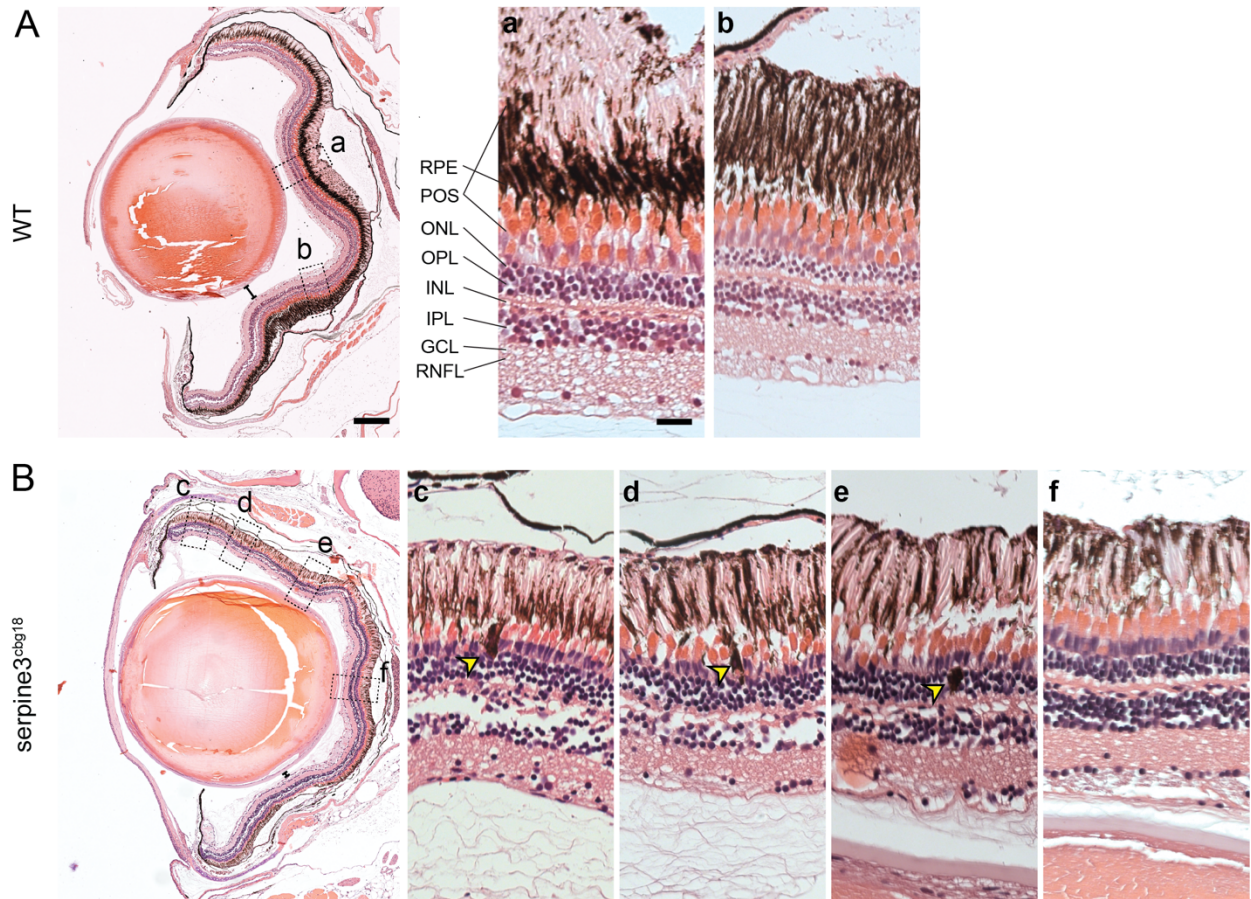

**Fig. S16.** Hematoxylin/eosin histology staining of *serpine3<sup>cgbg18</sup>* eyes (14 months) reveals histological differences in comparison to their wild type (WT) siblings (dorsal top, ventral bottom). We show details of representative overview images for one eye of each genotype on the right. In comparison to WT, distance between lens and retina of *serpine3<sup>cgbg18</sup>* fish is reduced (distance bars). In the *serpine3<sup>cgbg18</sup>* eye (B), all retinal layers are present and distinguishable, although they are not as tightly packed and clearly separated as in the WT (c-f). Moreover, we observed displaced pigmented cells located mainly in the photoreceptor outer segment and the outer nuclear layer (yellow arrows, c-e). Furthermore, the photoreceptor outer segment and RPE layer are not clearly separated in the *serpine3<sup>cgbg18</sup>* retina. Scale bar in the overviews represents 200  $\mu\text{m}$  and in the magnifications 20  $\mu\text{m}$ .

## Supplementary References

1. M. S. Khan *et al.*, Serpin Inhibition Mechanism: A Delicate Balance between Native Metastable State and Polymerization. *J Amino Acids* **2011**, 606797 (2011).
2. M. Simonovic, P. G. Gettins, K. Volz, Crystal structure of human PEDF, a potent anti-angiogenic and neurite growth-promoting factor. *Proc Natl Acad Sci U S A* **98**, 11131-11135 (2001).
3. J. Jumper *et al.*, Highly accurate protein structure prediction with AlphaFold. *Nature* **596**, 583-589 (2021).
4. P. E. Stein, A. G. Leslie, J. T. Finch, R. W. Carrell, Crystal structure of uncleaved ovalbumin at 1.95 Å resolution. *J Mol Biol* **221**, 941-959 (1991).
5. G. E. Crooks, G. Hon, J. M. Chandonia, S. E. Brenner, WebLogo: a sequence logo generator. *Genome Res* **14**, 1188-1190 (2004).
